# Supplementary material for: Iron-catalyzed regioselective direct coupling of aromatic aldehydes with coumarins leading to 3-aroyl coumarins
Source: Royal Society of Chemistry journal article supplement (doi:10.1039/c5ra16573c), 2015-01-01
Supplement: c5ra16573c1.pdf [file c5ra16573c1.pdf]

# Supporting Information

## **Iron-catalyzed regioselective direct coupling of aromatic aldehydes with coumarins leading to 3-aroyl coumarins**

Jin-Wei Yuan,\* Qiu-Yue Yin, Liang-Ru Yang, Wen-Peng Mai, Pu Mao,\*

Yong-Mei Xiao and Ling-Bo Qu\*

*School of Chemistry & Chemical Engineering, Henan University of Technology, Zhengzhou*

*450001, China*

**E-mail:** yuanjinweigs@126.com; maopu@haut.edu.cn, qulingbo@haut.edu.cn

---

**Table 1** Synthesis of 3-benzoyl coumarin using different oxidants

NMR Spectra of products

**Table 1** Synthesis of 3-benzoyl coumarin using different oxidants<sup>a</sup>

| 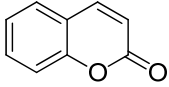 | +                                                             |  | $\xrightarrow[\text{PhCl, N}_2, 120^\circ\text{C}]{\text{[O] (4.0 equiv), FeCl}_2 \text{ (10 mol\%)}}$ |  |
|-----------------------------------------------------------------------------------|---------------------------------------------------------------|-----------------------------------------------------------------------------------|--------------------------------------------------------------------------------------------------------|------------------------------------------------------------------------------------|
| <b>1a</b>                                                                         |                                                               | <b>2a</b>                                                                         |                                                                                                        | <b>3aa</b>                                                                         |
|                                                                                   |                                                               |                                                                                   |                                                                                                        |                                                                                    |
| Entry                                                                             | [O]                                                           | Yield <sup>b</sup> (%)                                                            |                                                                                                        |                                                                                    |
| 1                                                                                 | H <sub>2</sub> O <sub>2</sub>                                 | trace                                                                             |                                                                                                        |                                                                                    |
| 2 <sup>c</sup>                                                                    | DTBP                                                          | 15                                                                                |                                                                                                        |                                                                                    |
| 3                                                                                 | K <sub>2</sub> S <sub>2</sub> O <sub>8</sub>                  | nr <sup>d</sup>                                                                   |                                                                                                        |                                                                                    |
| 4                                                                                 | (NH <sub>4</sub> ) <sub>2</sub> S <sub>2</sub> O <sub>8</sub> | nr                                                                                |                                                                                                        |                                                                                    |
| 5 <sup>e</sup>                                                                    | air                                                           | nr                                                                                |                                                                                                        |                                                                                    |

<sup>a</sup> Reaction conditions: **1a** (0.25 mmol), **2a** (1.0 mmol), FeCl<sub>2</sub> (10 mol%) as the catalyst, oxidant (4.0 equiv) in PhCl (2 mL) with stirring under nitrogen for 12 h.

<sup>b</sup> Isolated yield.

<sup>c</sup> DTBP: di-tert-butyl hydrogen peroxide.

<sup>d</sup> nr = no reaction

<sup>e</sup> No N<sub>2</sub>, using O<sub>2</sub> in the air as the oxidant.

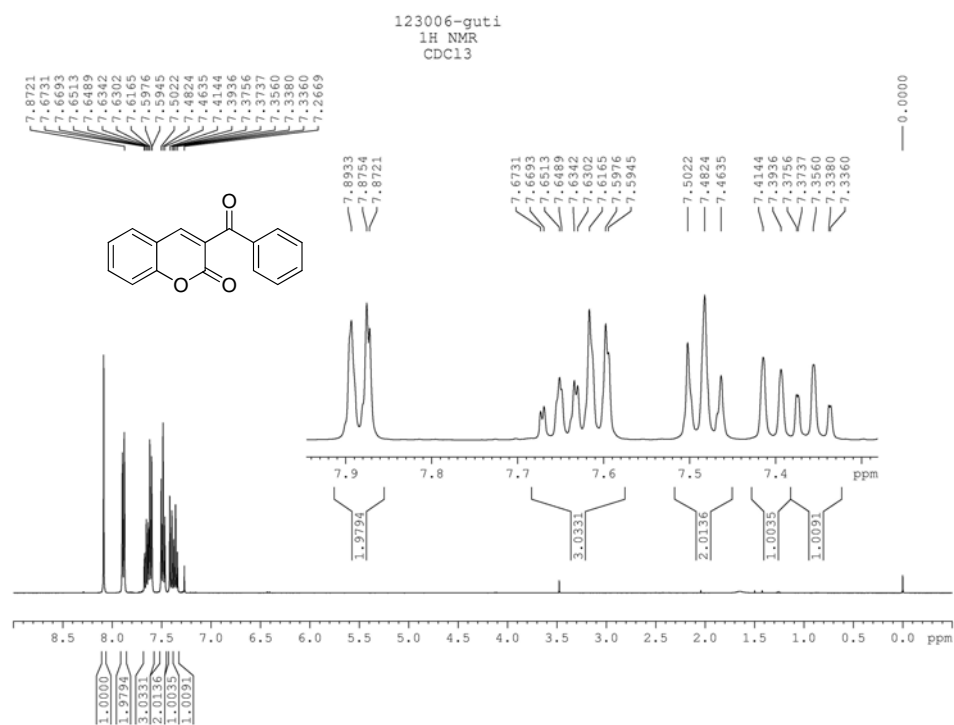

<sup>1</sup>H NMR spectrum of compound **3aa**

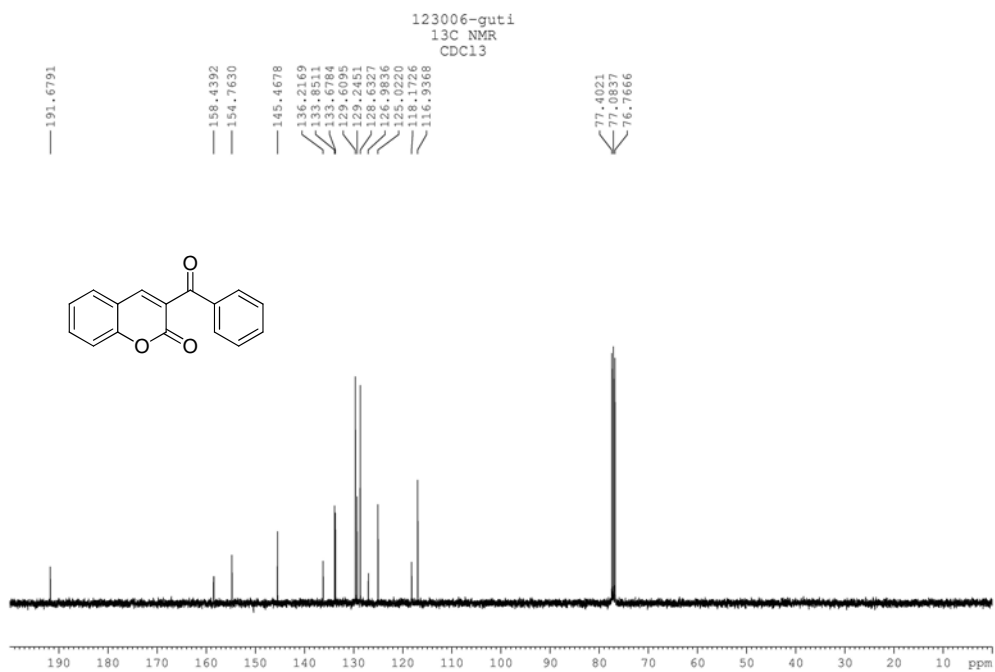

<sup>13</sup>C NMR spectrum of compound **3aa**

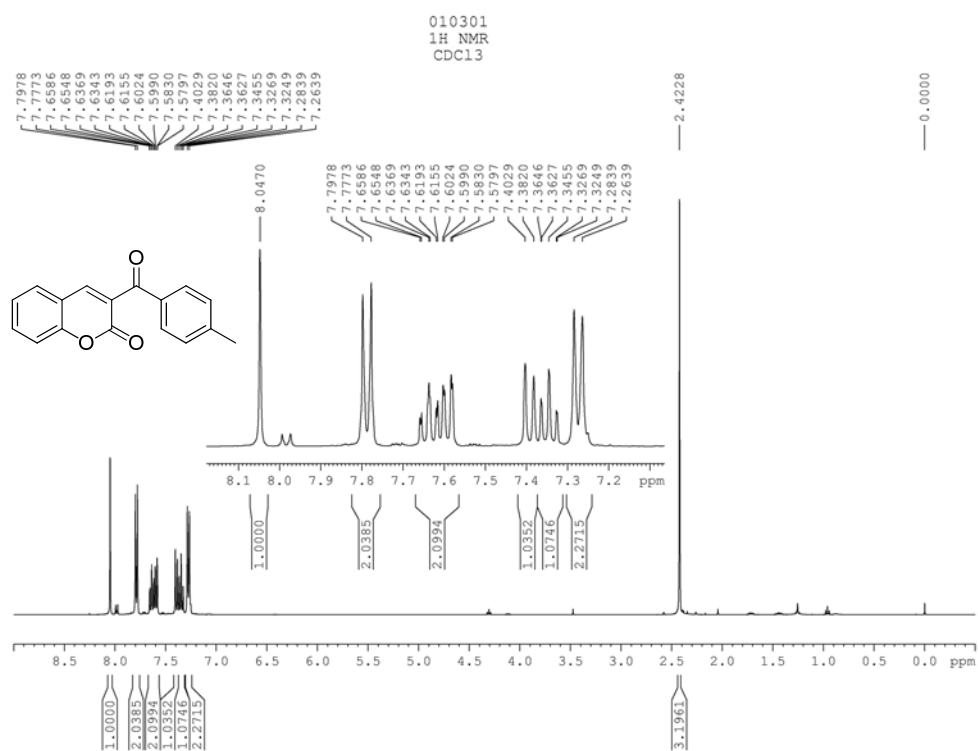

<sup>1</sup>H NMR spectrum of compound **3ab**

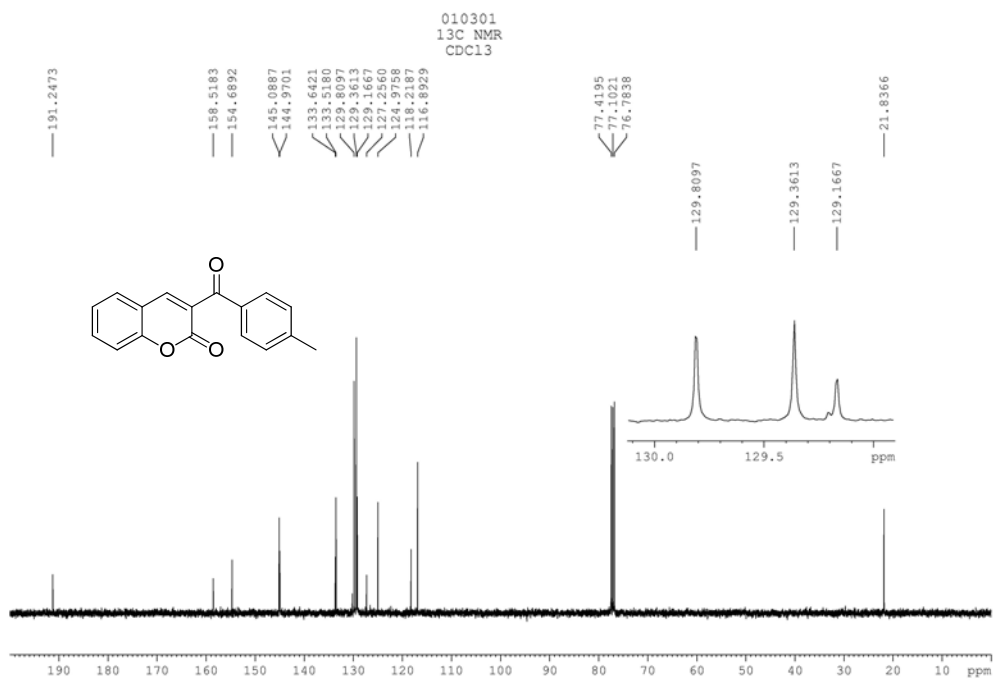

<sup>13</sup>C NMR spectrum of compound **3ab**

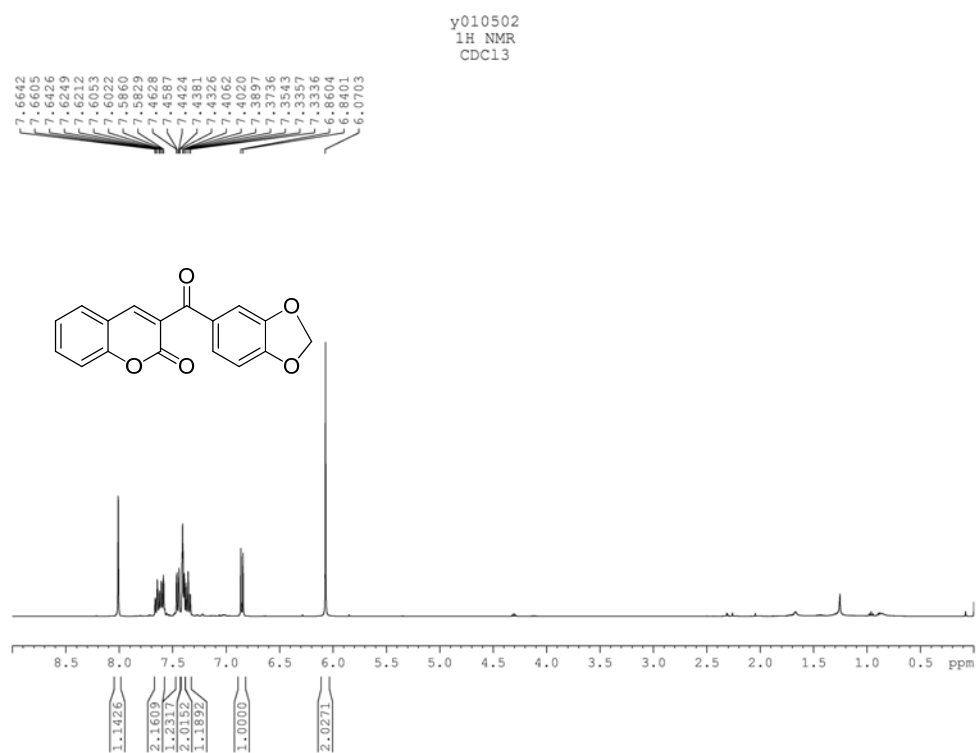

<sup>1</sup>H NMR spectrum of compound **3ac**

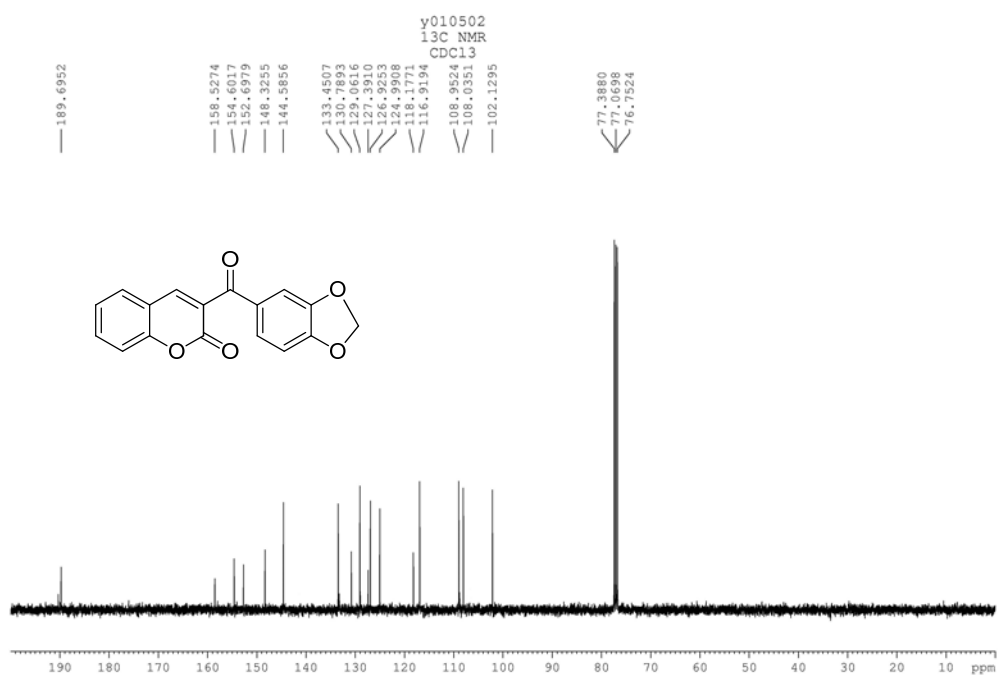

<sup>13</sup>C NMR spectrum of compound **3ac**

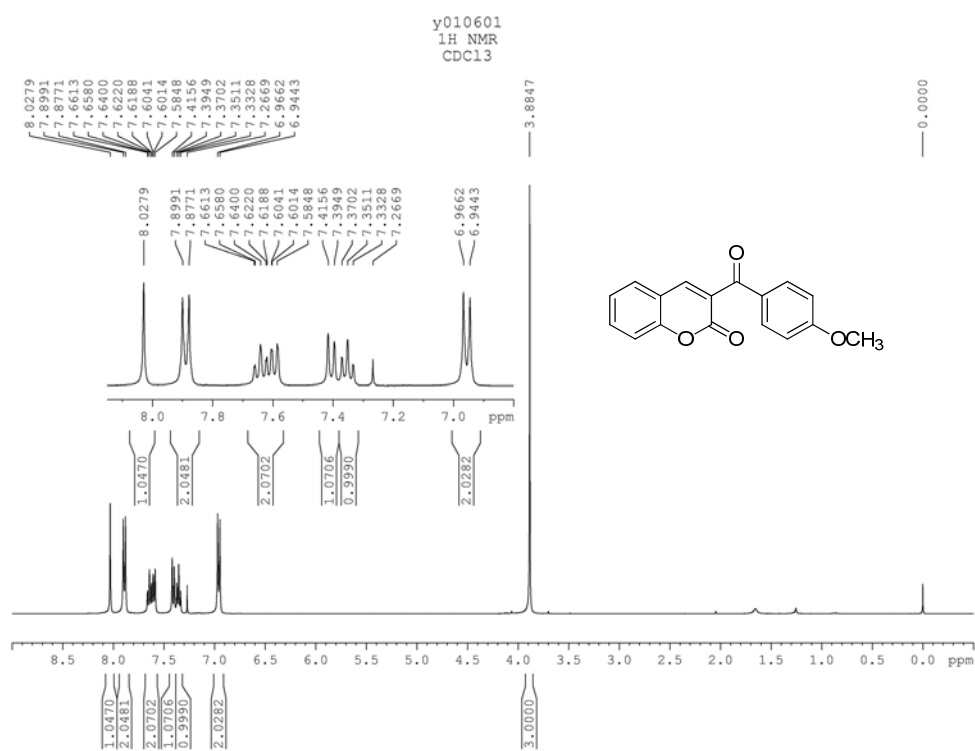

<sup>1</sup>H NMR spectrum of compound **3ad**

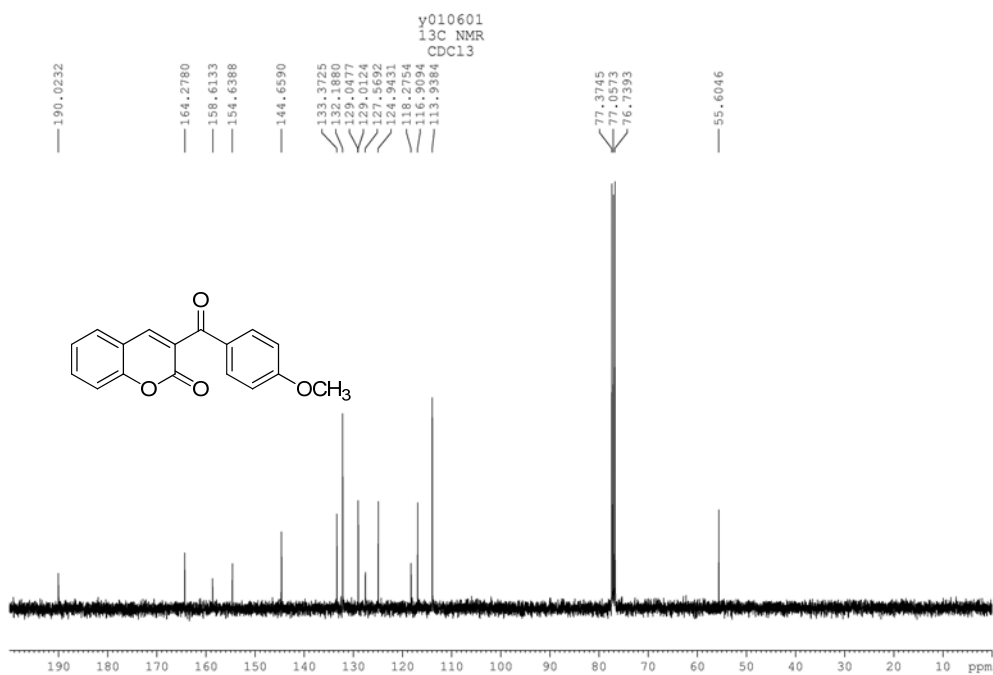

<sup>13</sup>C NMR spectrum of compound **3ad**

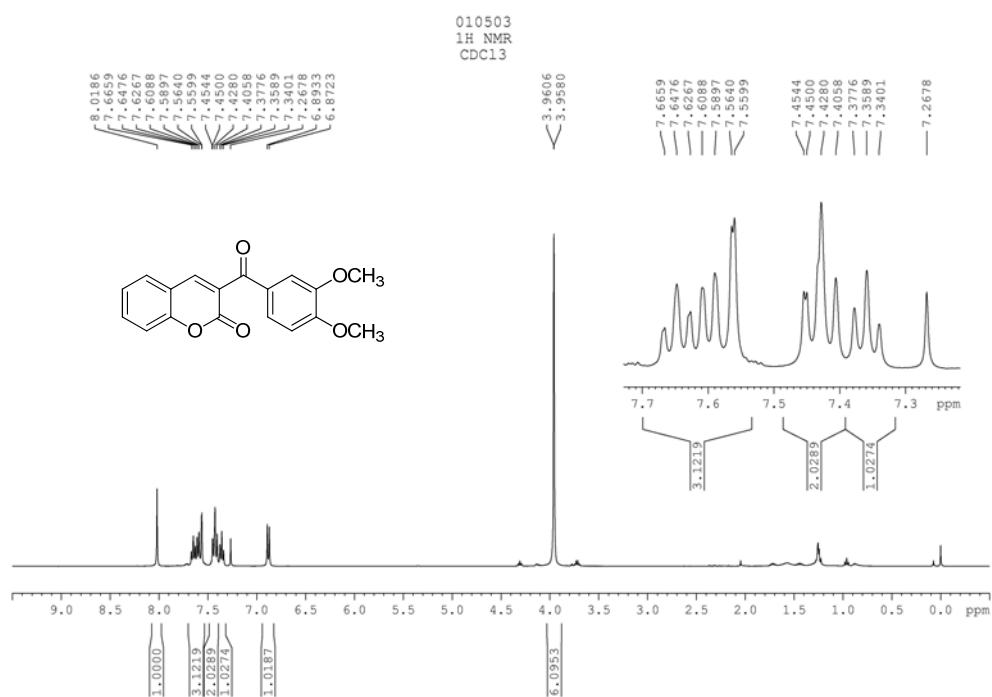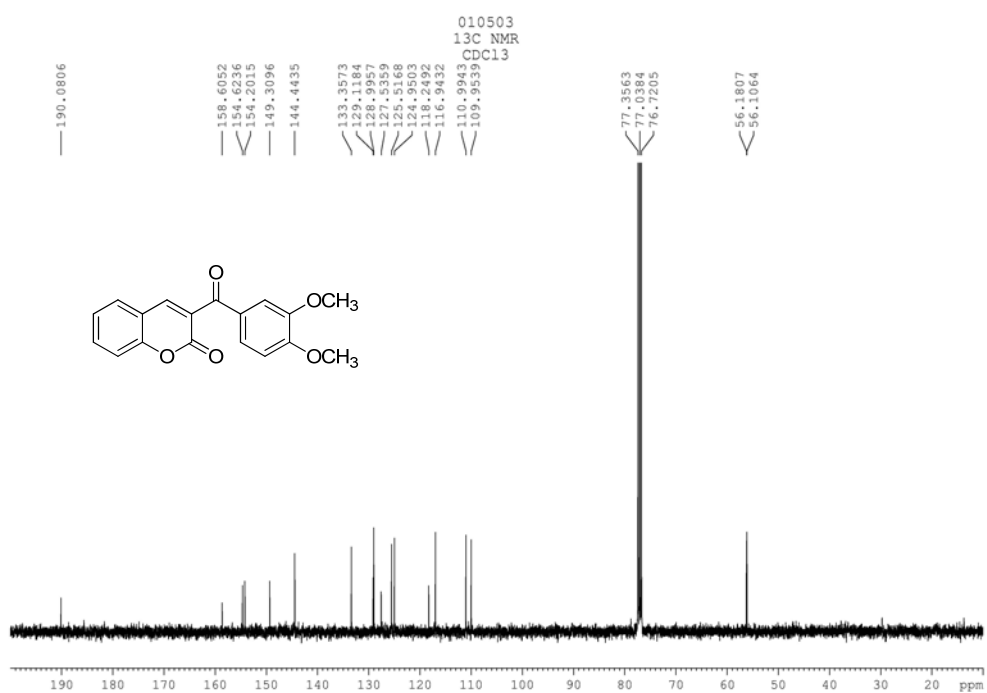

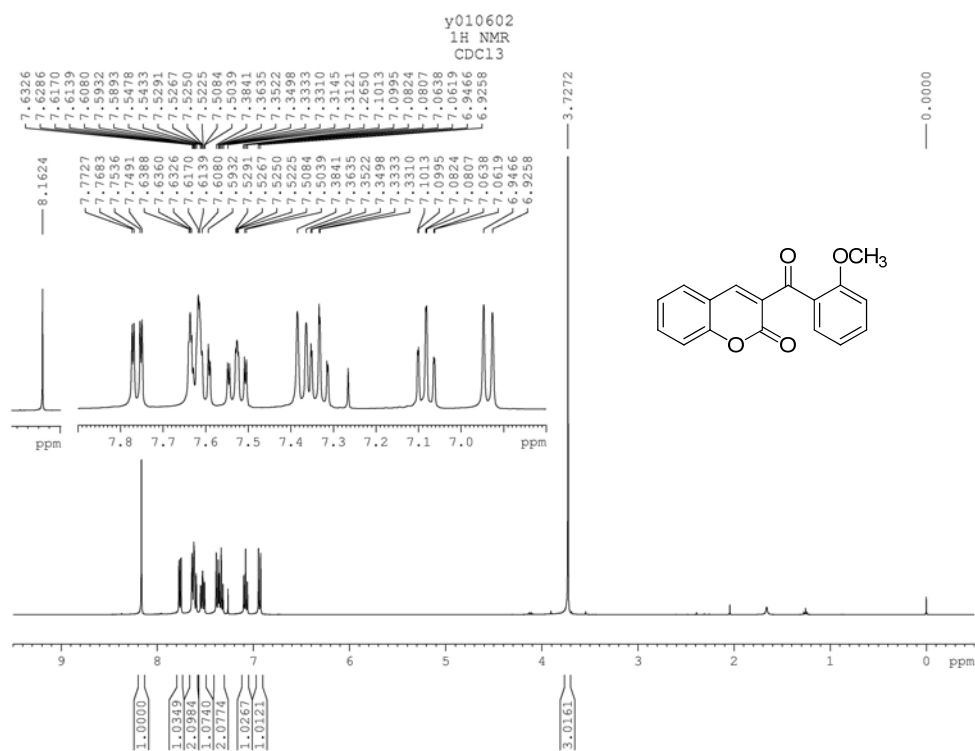

<sup>1</sup>H NMR spectrum of compound **3af**

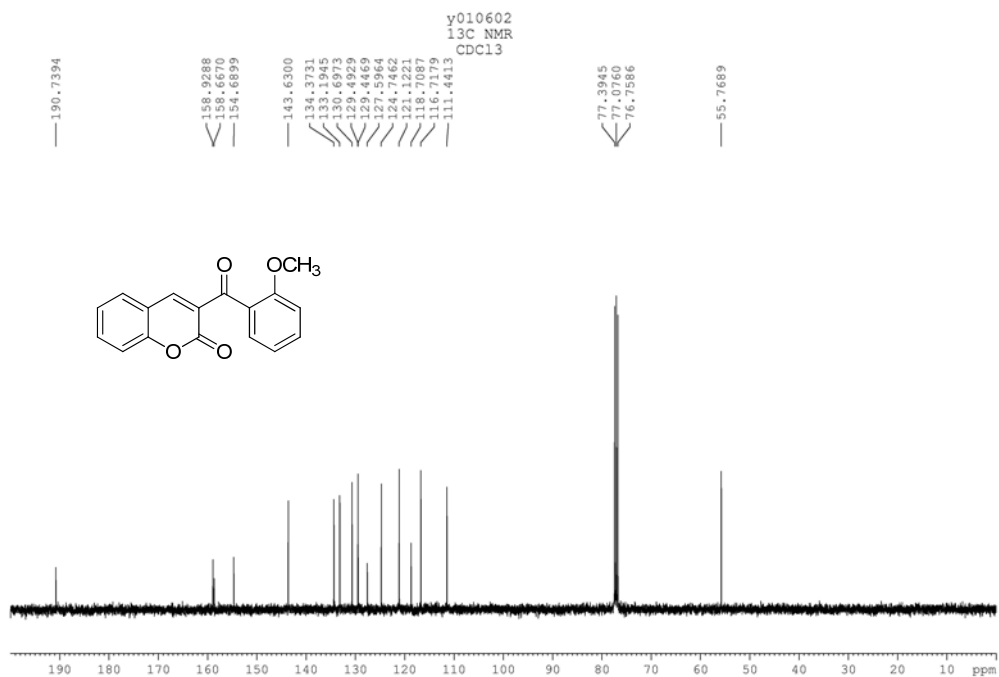

<sup>13</sup>C NMR spectrum of compound **3af**



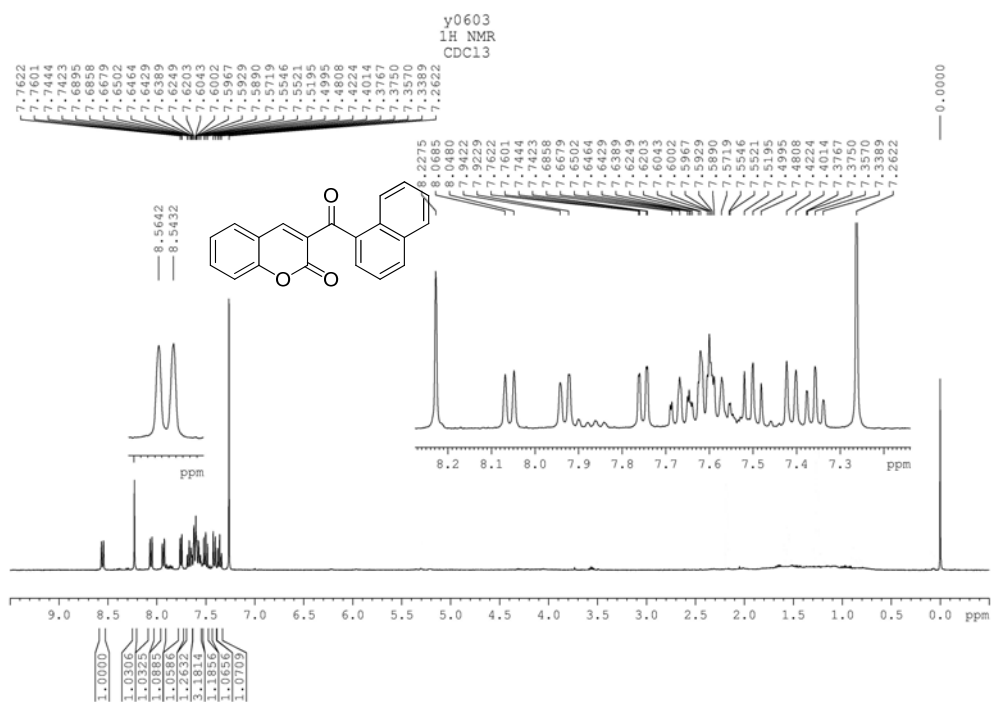

<sup>1</sup>H NMR spectrum of compound **3ag**

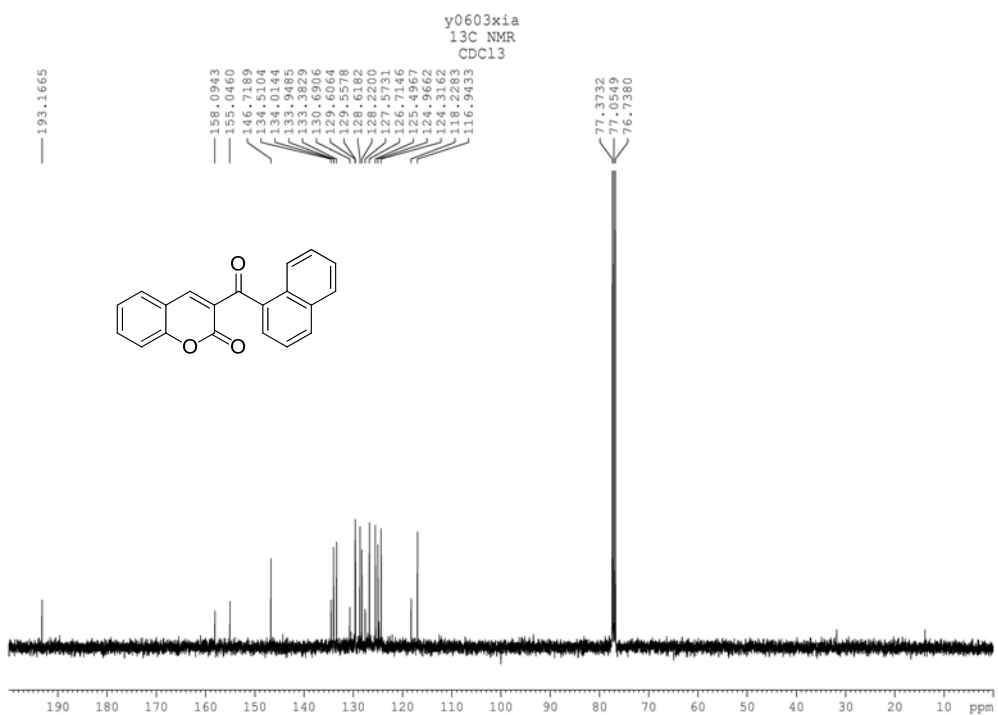

<sup>13</sup>C NMR spectrum of compound **3ag**

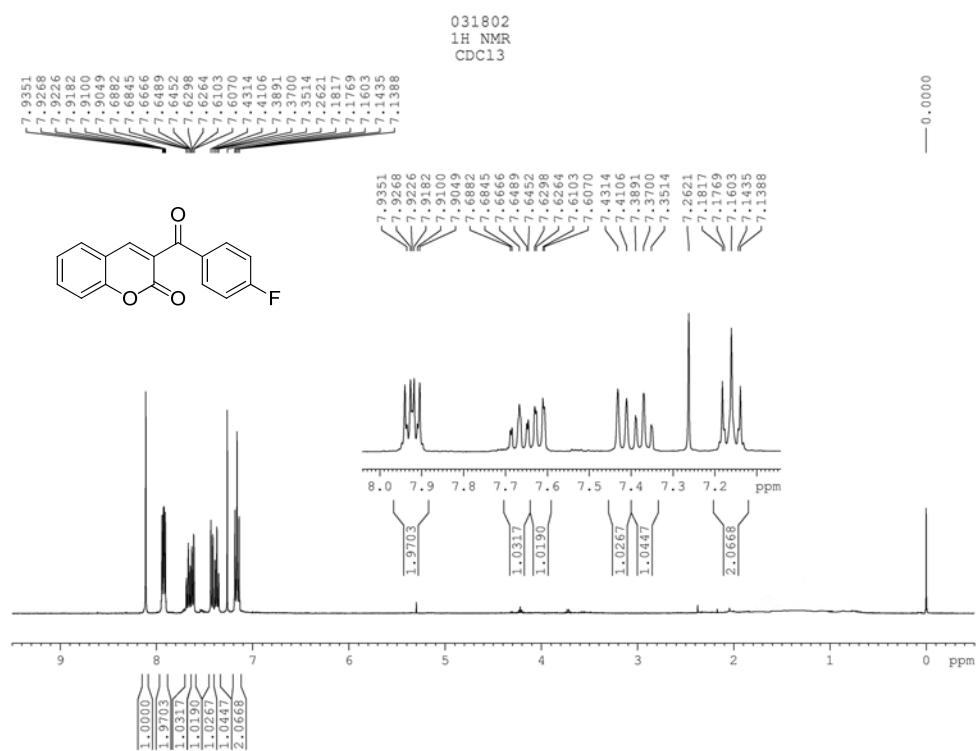

<sup>1</sup>H NMR spectrum of compound **3ah**

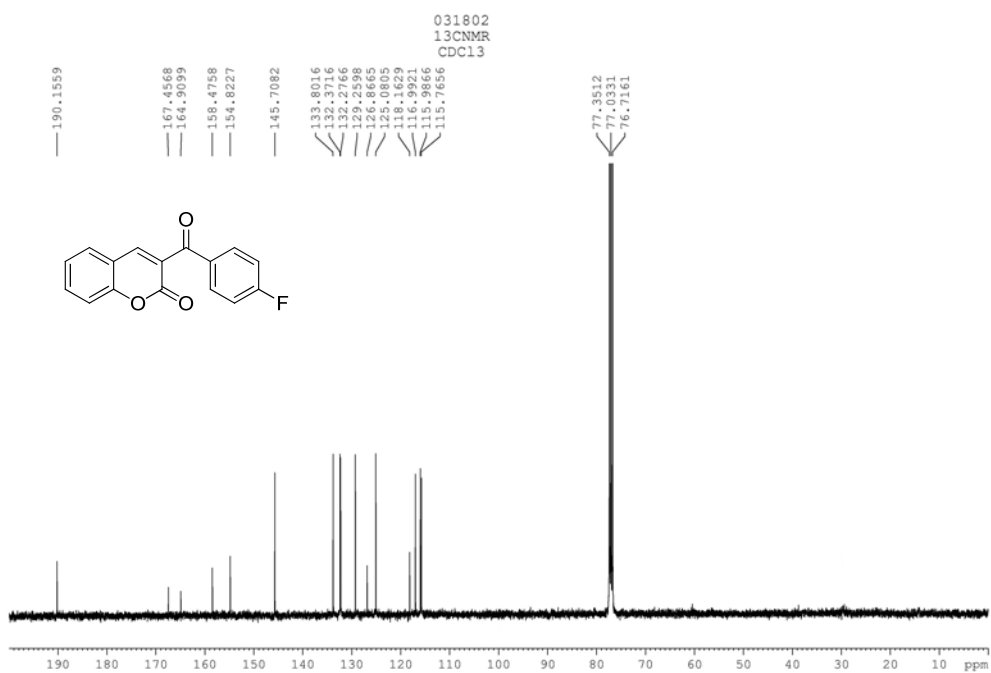

<sup>13</sup>C NMR spectrum of compound **3ah**

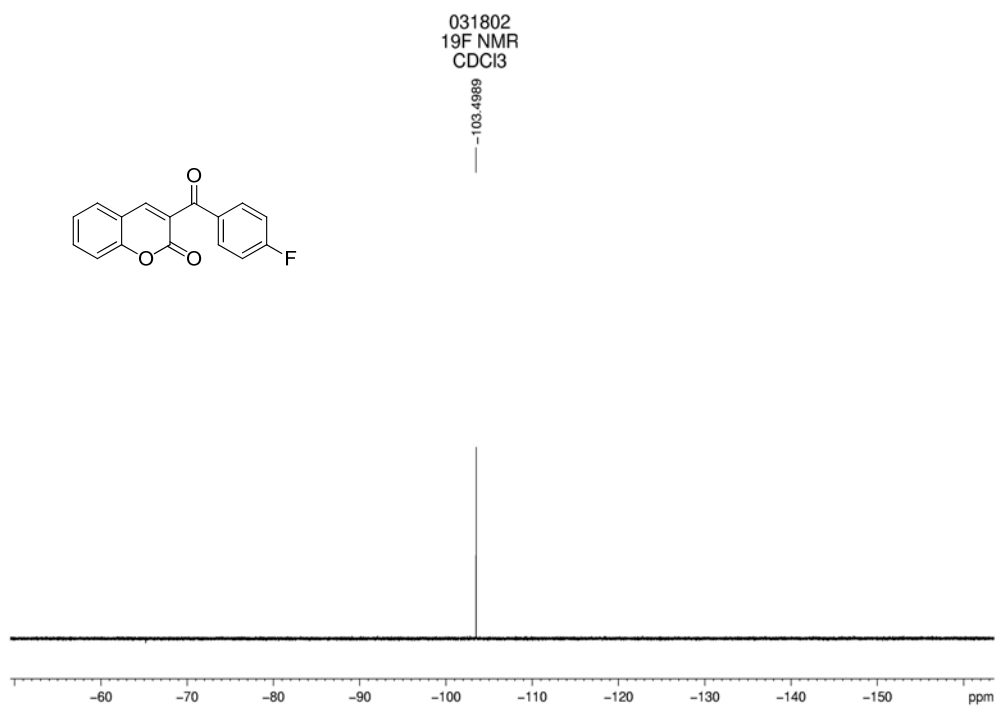

<sup>19</sup>F NMR spectrum of compound **3ah**

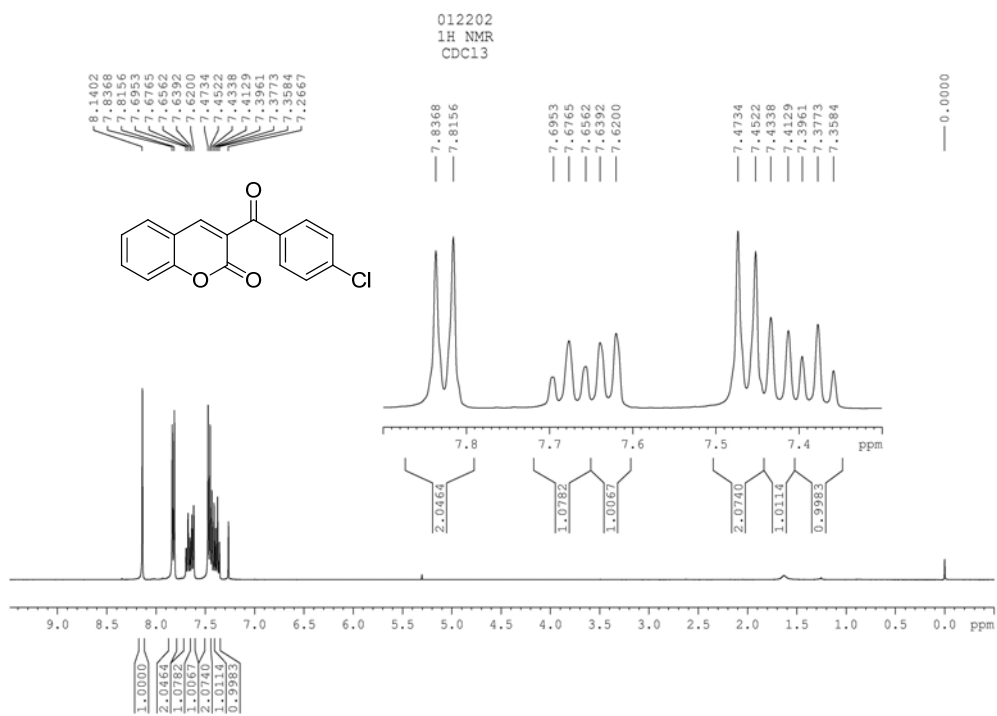

<sup>1</sup>H NMR spectrum of compound **3ai**

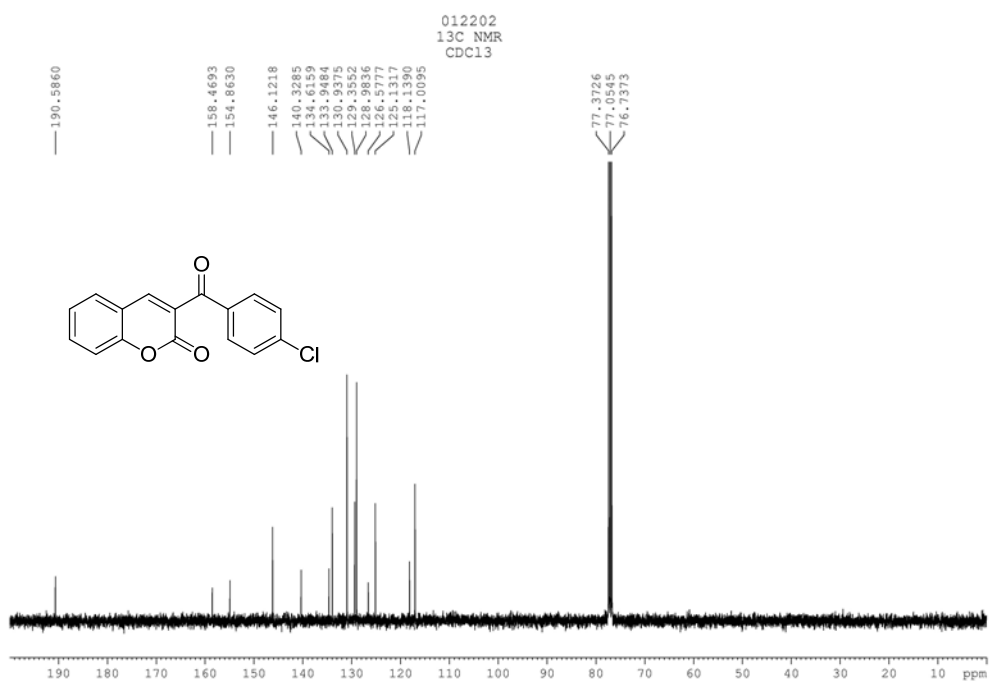

<sup>13</sup>C NMR spectrum of compound **3ai**

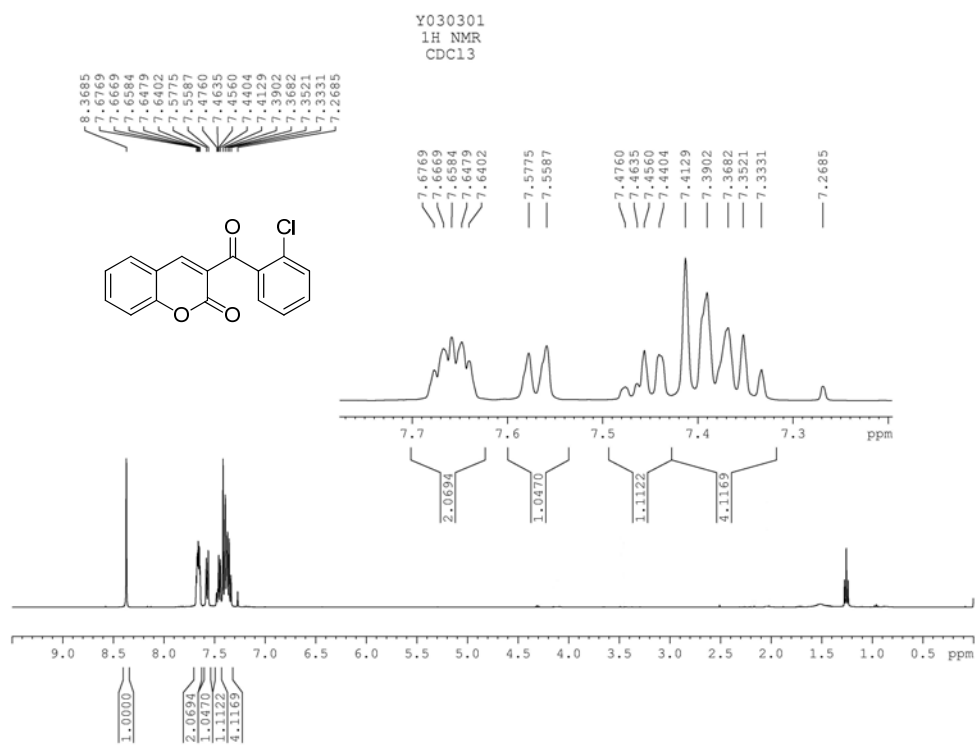

<sup>1</sup>H NMR spectrum of compound **3aj**

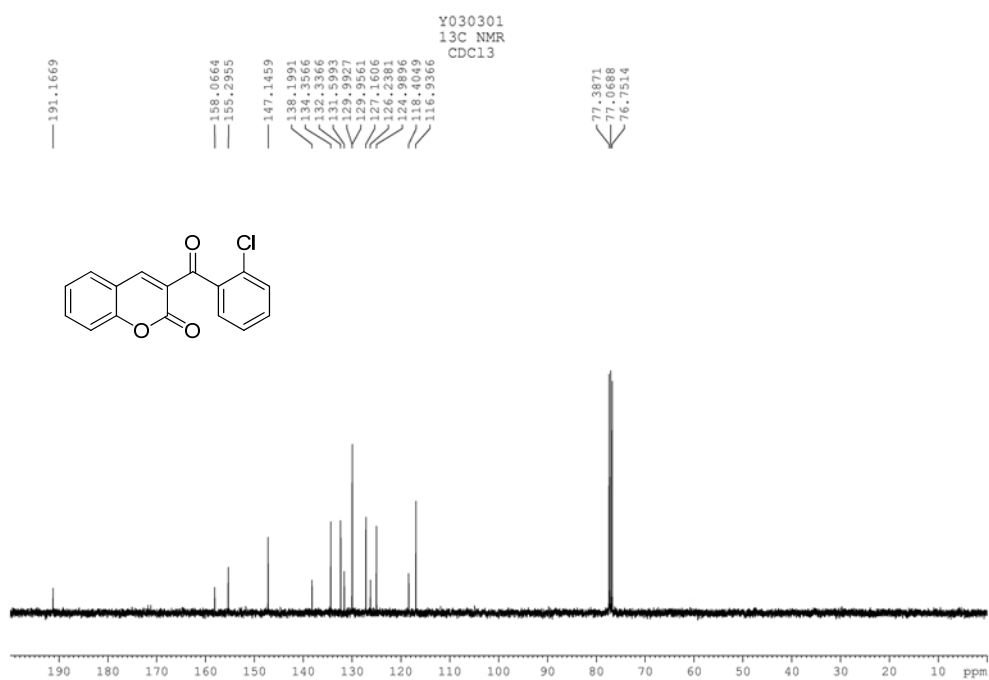

<sup>13</sup>C NMR spectrum of compound **3aj**

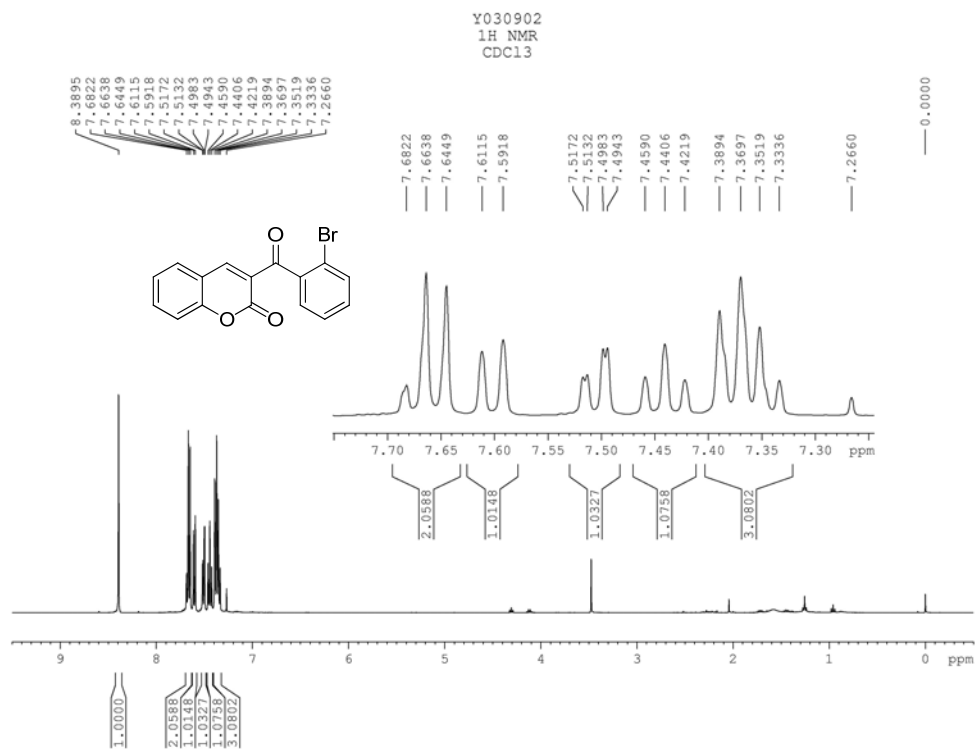

<sup>1</sup>H NMR spectrum of compound **3ak**

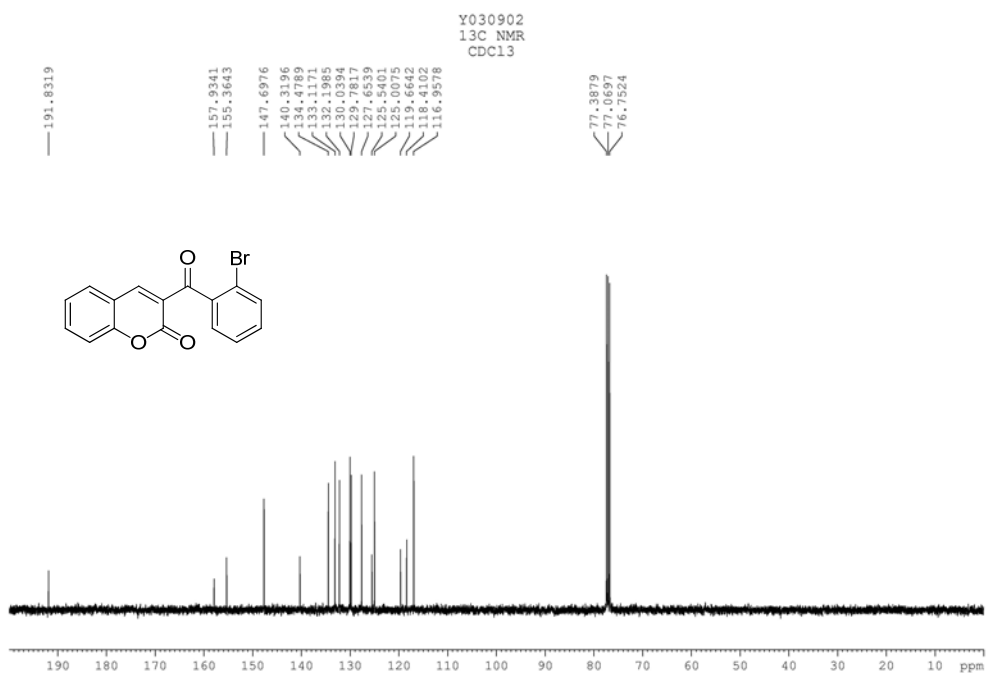

<sup>13</sup>C NMR spectrum of compound **3ak**

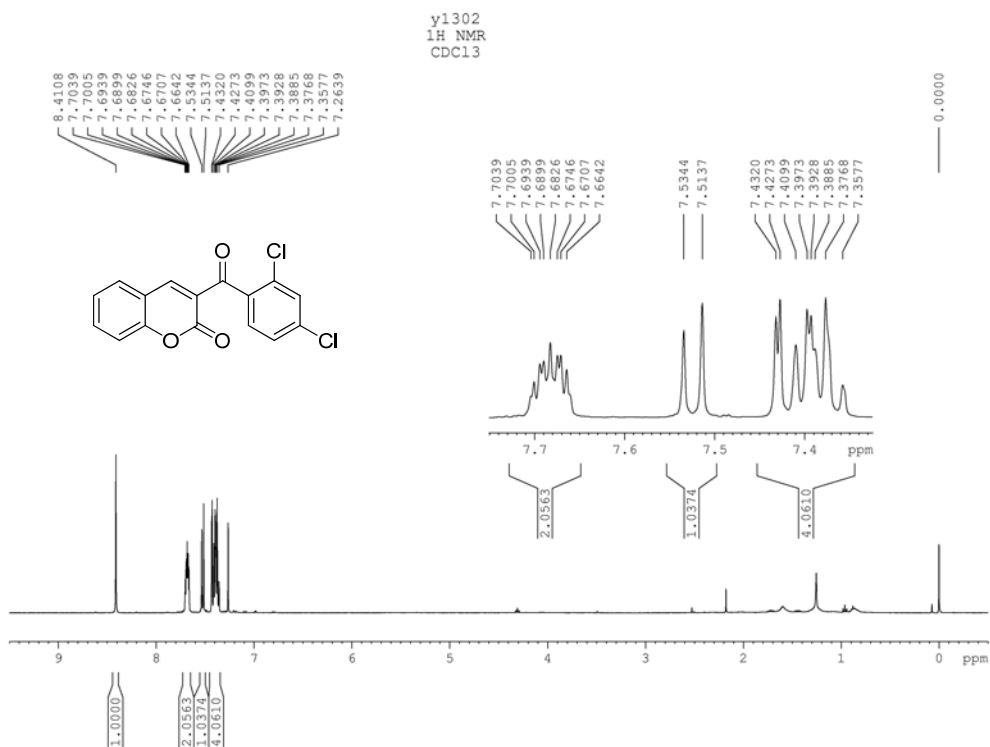

<sup>1</sup>H NMR spectrum of compound **3al**

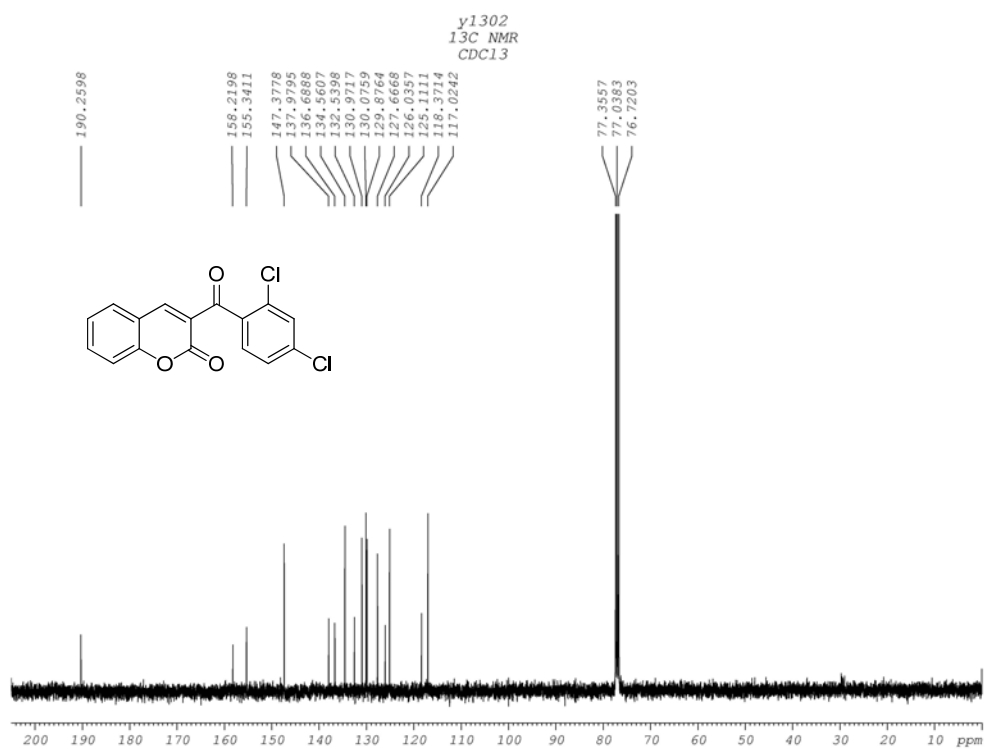

<sup>13</sup>C NMR spectrum of compound **3al**

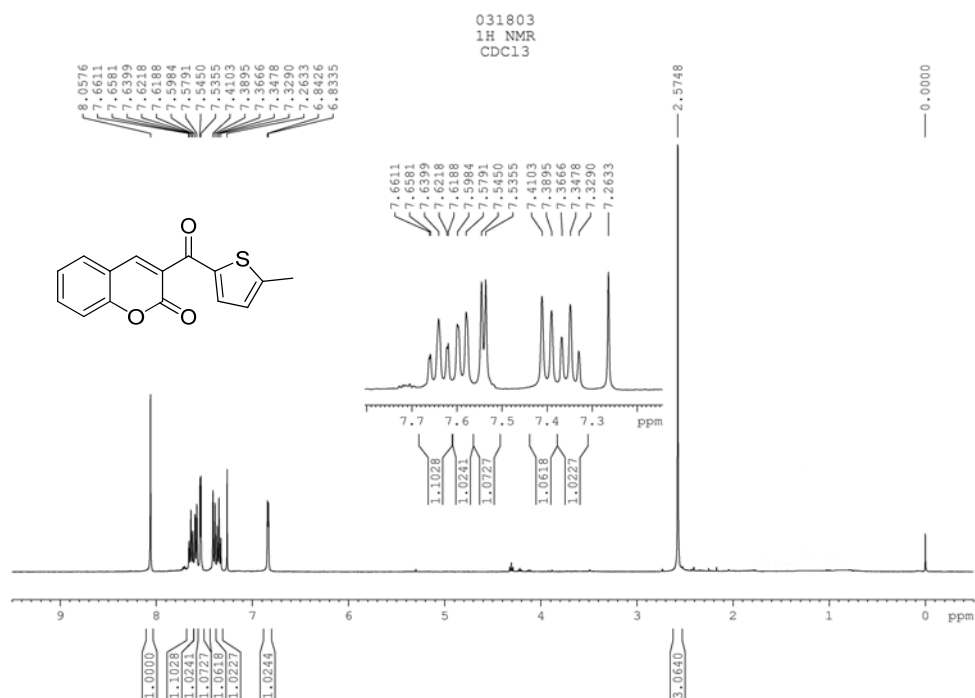

<sup>1</sup>H NMR spectrum of compound **3am**

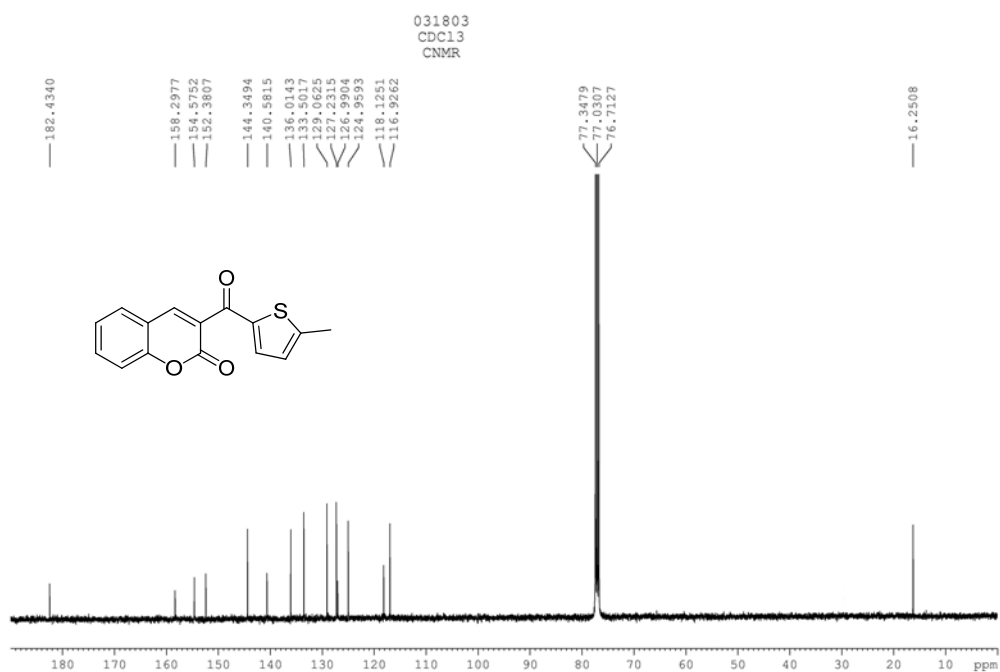

<sup>13</sup>C NMR spectrum of compound **3am**

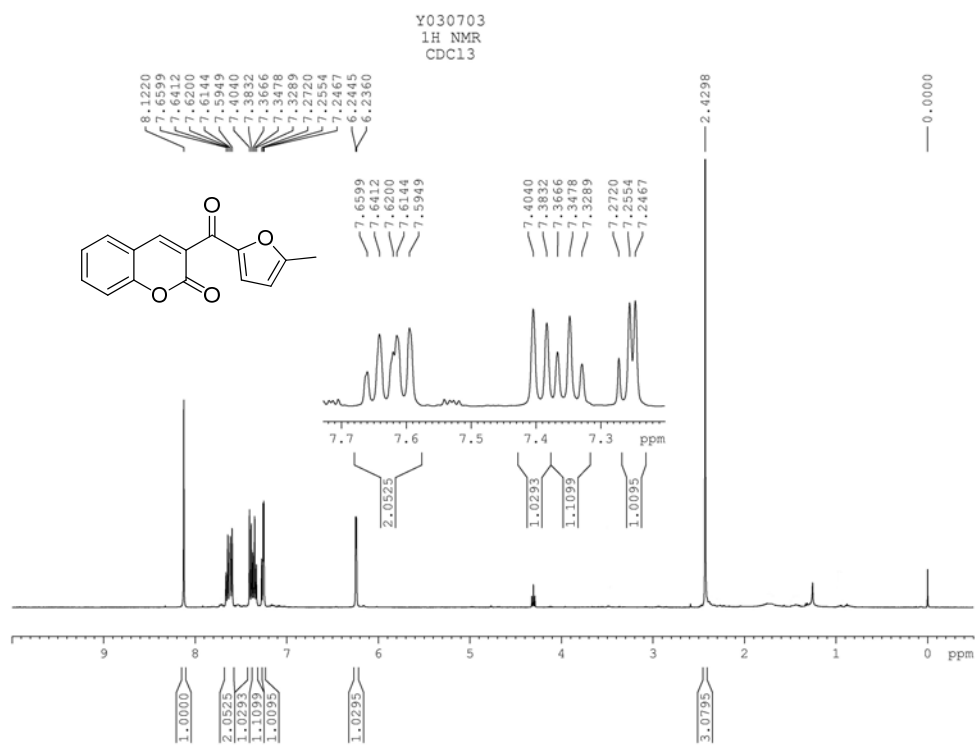

<sup>1</sup>H NMR spectrum of compound **3an**



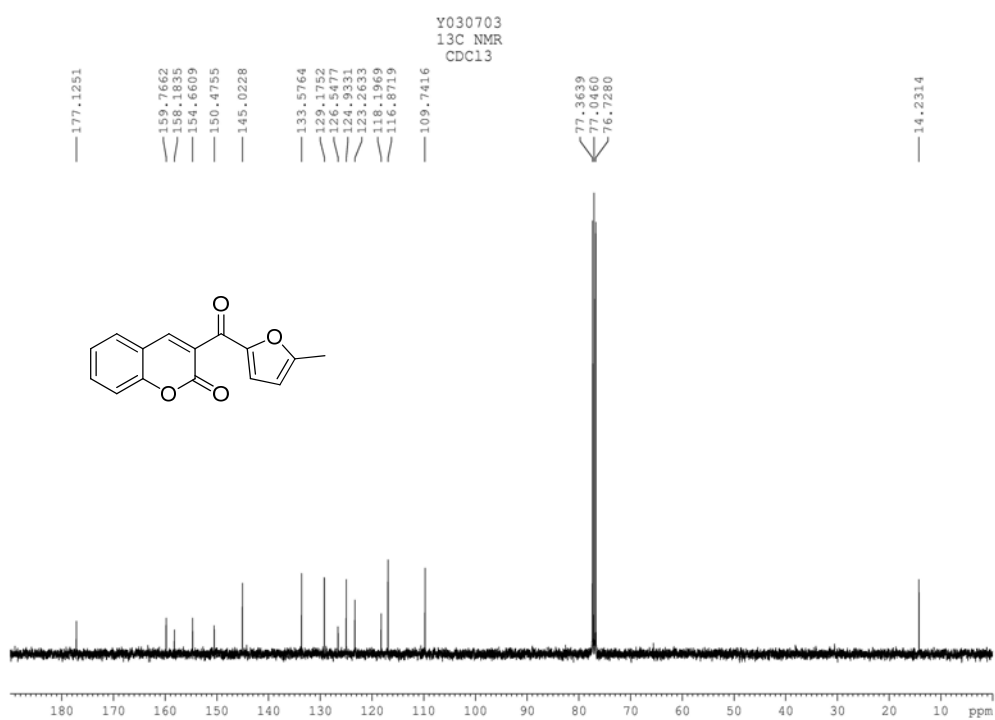

$^{13}\text{C}$  NMR spectrum of compound **3an**

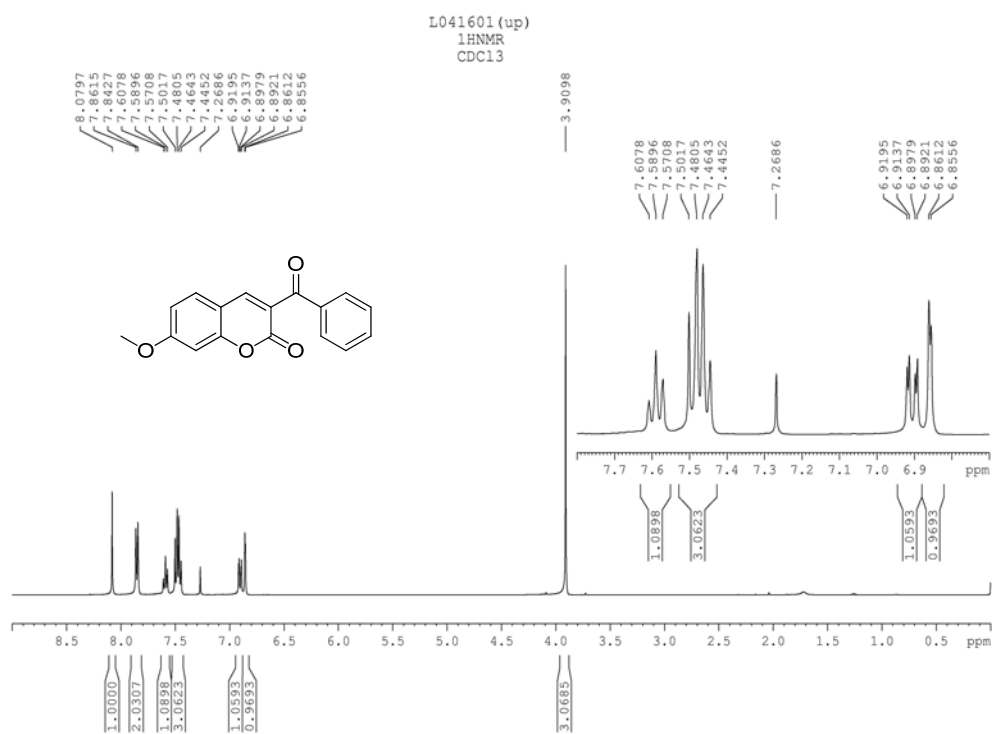

$^1\text{H}$  NMR spectrum of compound **3ba**

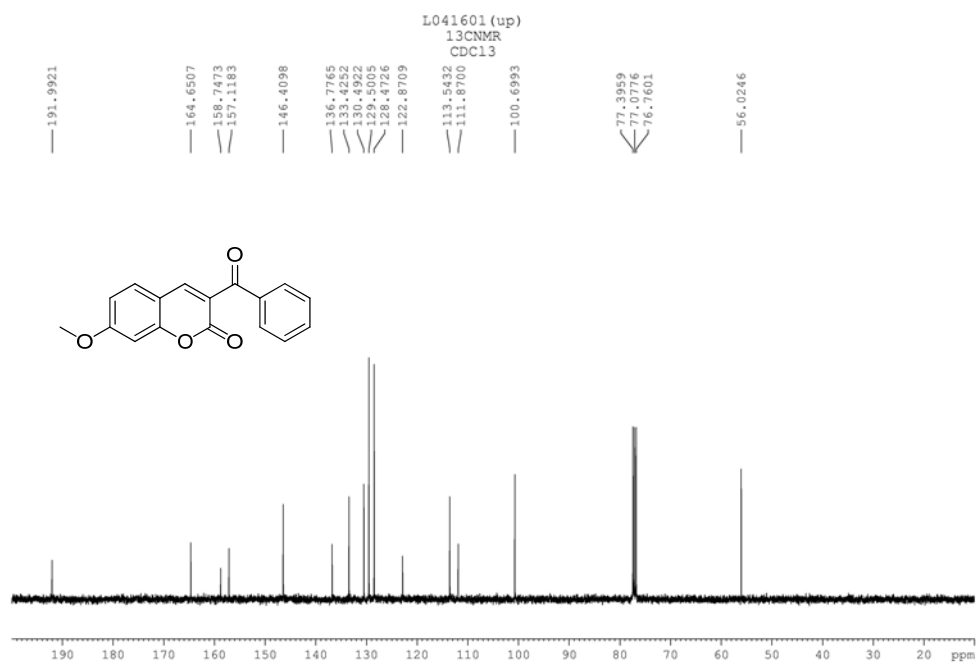

<sup>13</sup>C NMR spectrum of compound **3ba**

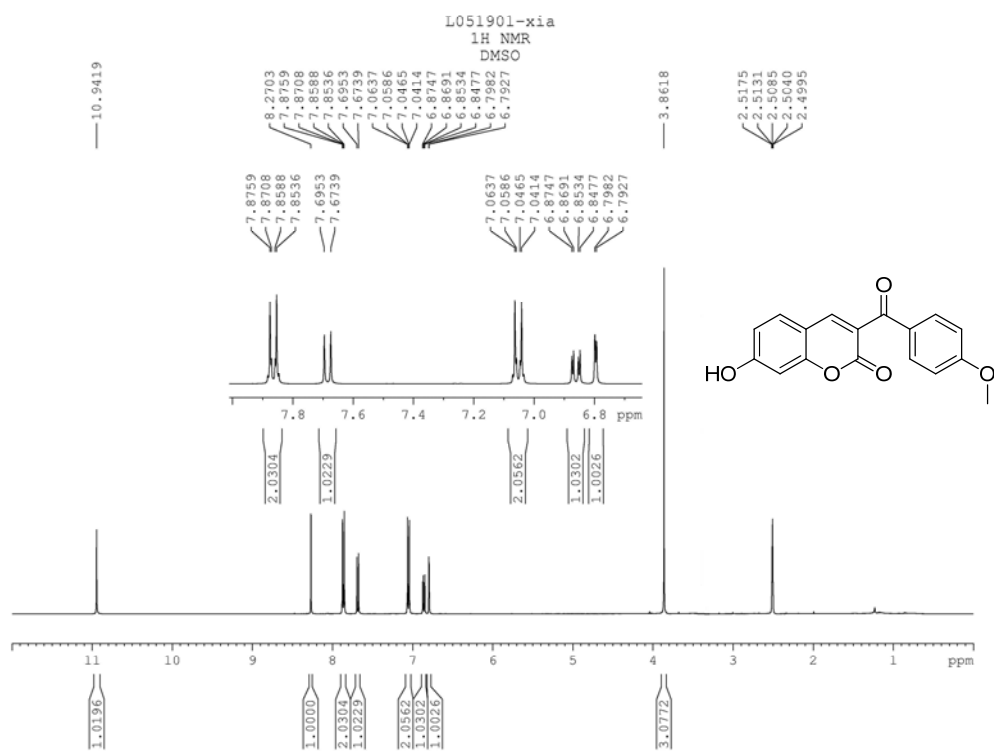

<sup>1</sup>H NMR spectrum of compound **3ce**

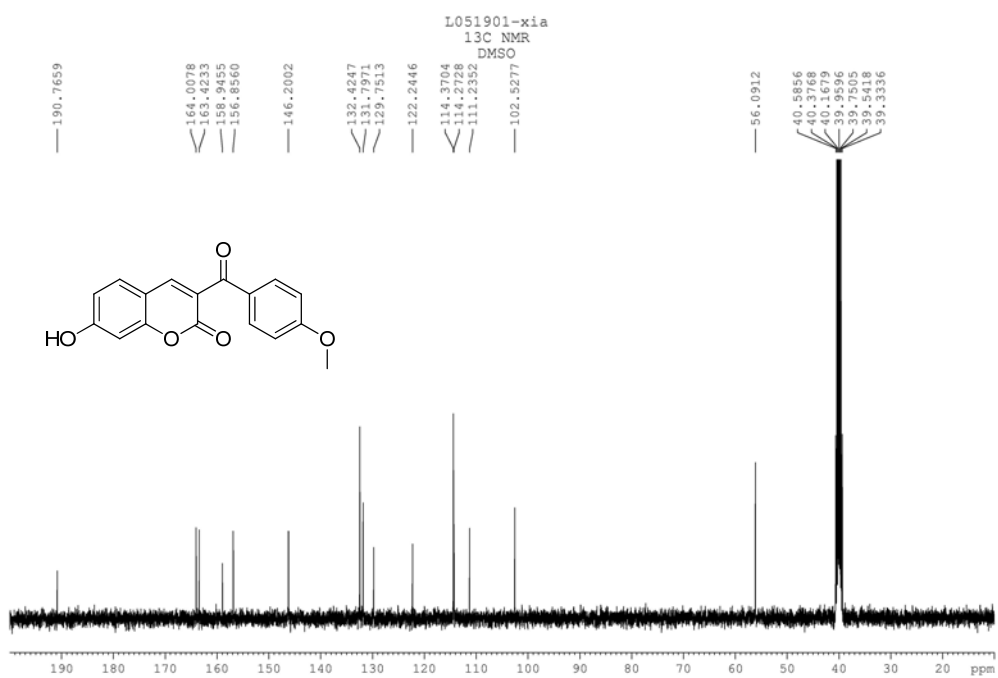 $^{13}\text{C}$  NMR spectrum of compound **3ce**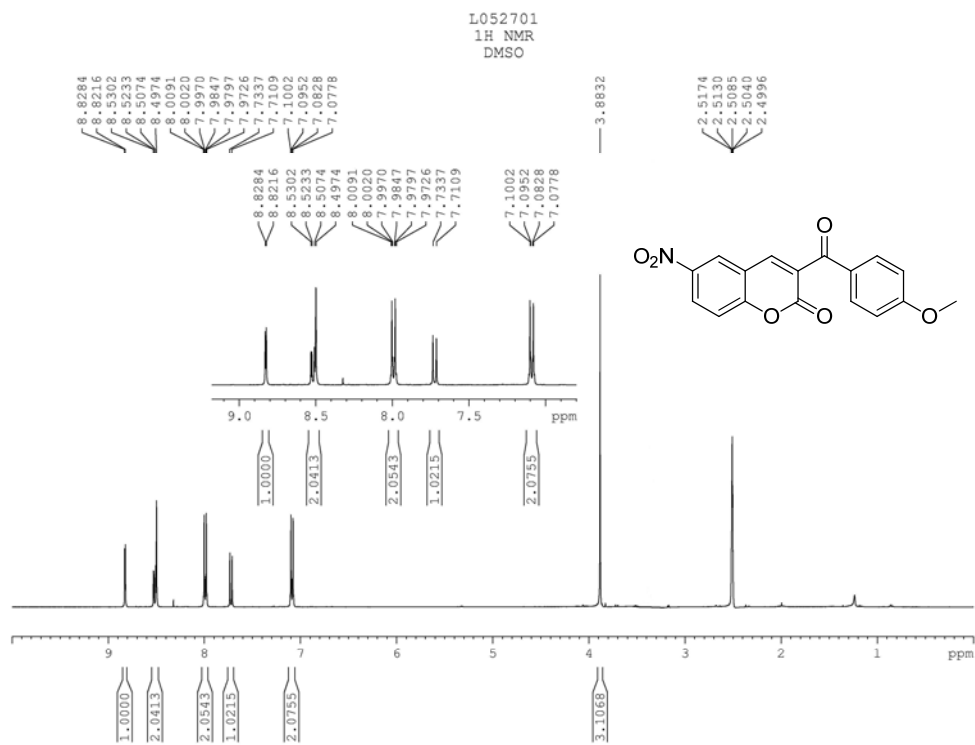<sup>1</sup>H NMR spectrum of compound **3de**

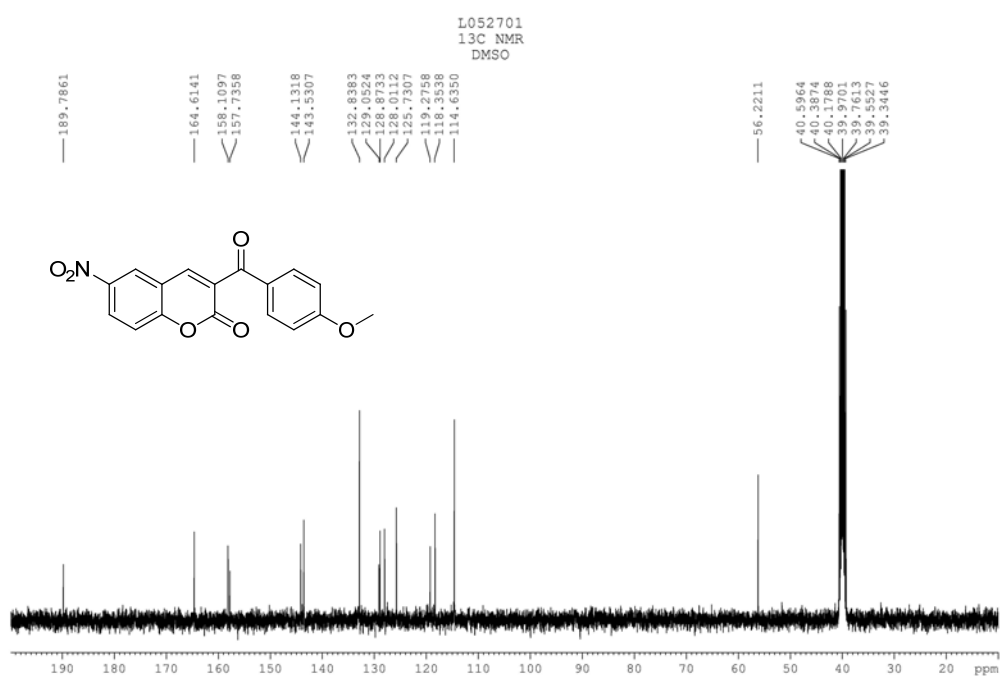

<sup>13</sup>C NMR spectrum of compound **3de**

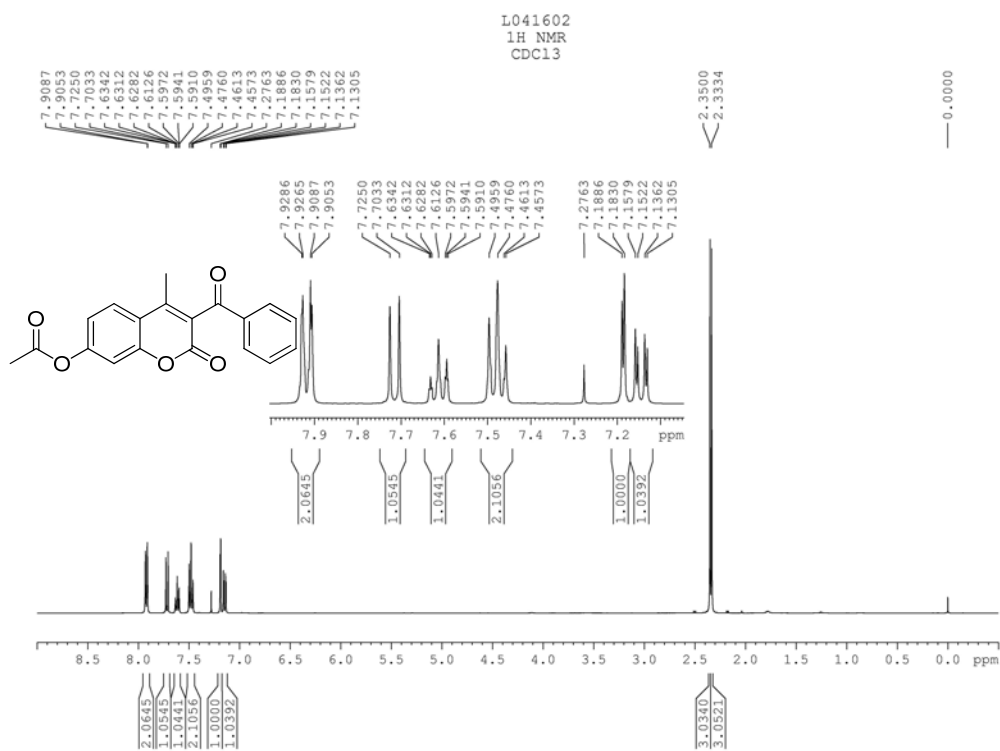

<sup>1</sup>H NMR spectrum of compound **3ea**

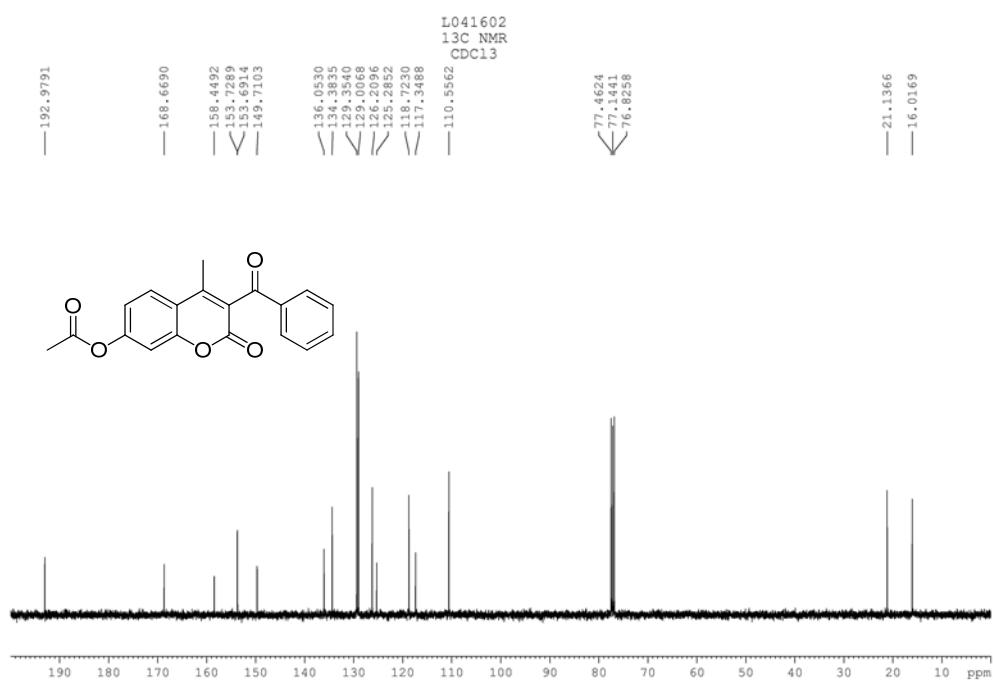

<sup>13</sup>C NMR spectrum of compound **3ea**

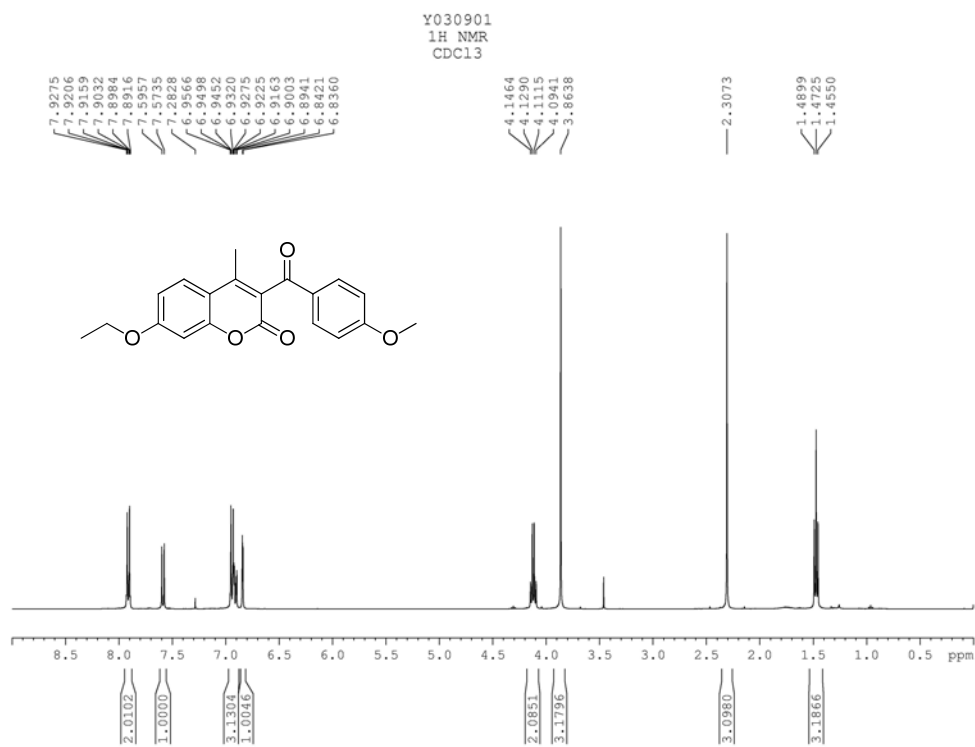

<sup>1</sup>H NMR spectrum of compound **3fe**

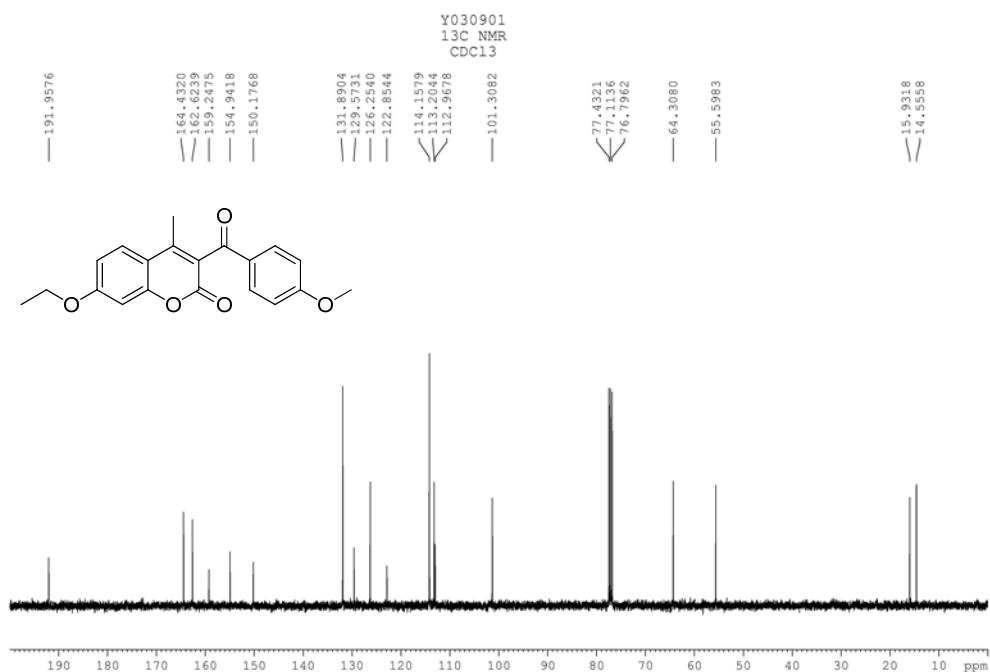

<sup>13</sup>C NMR spectrum of compound **3fe**

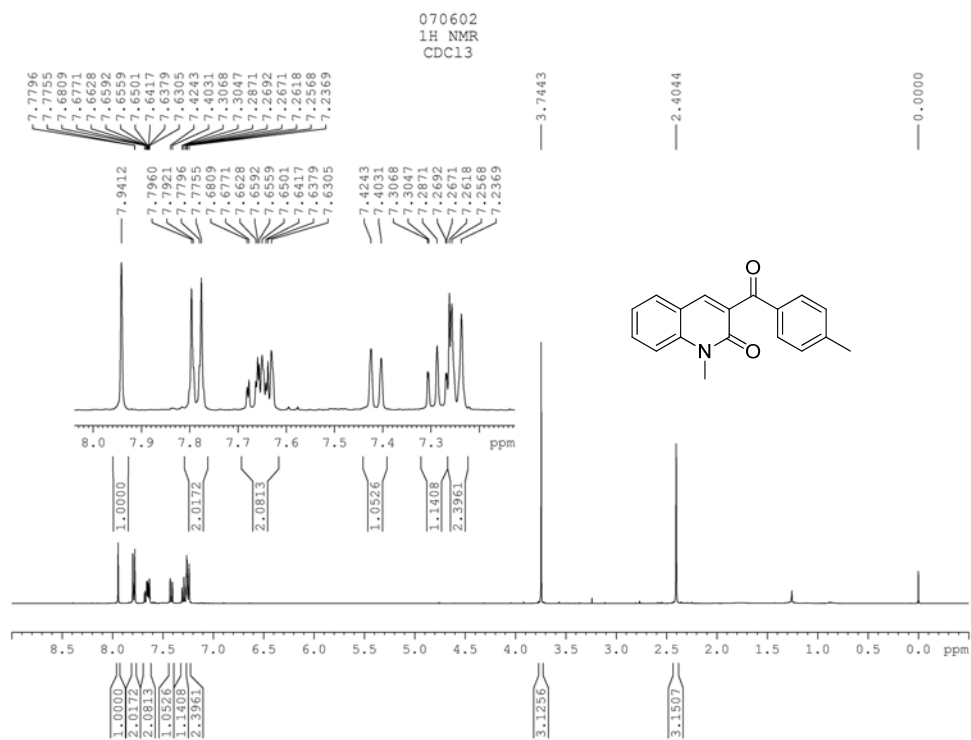

<sup>1</sup>H NMR spectrum of compound **5ab**

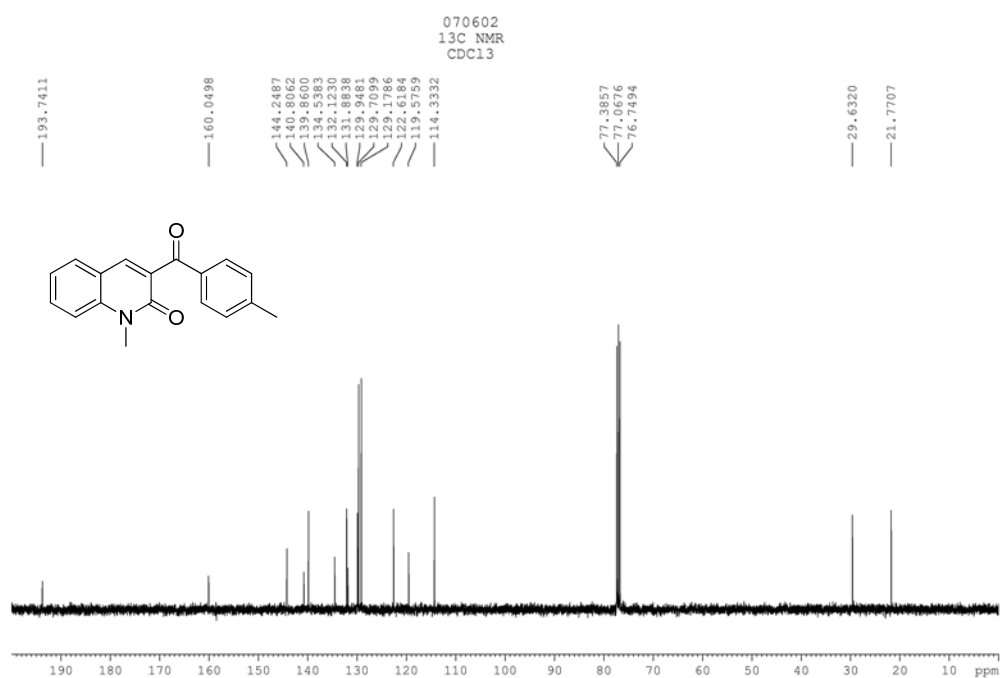

<sup>13</sup>C NMR spectrum of compound **5ab**

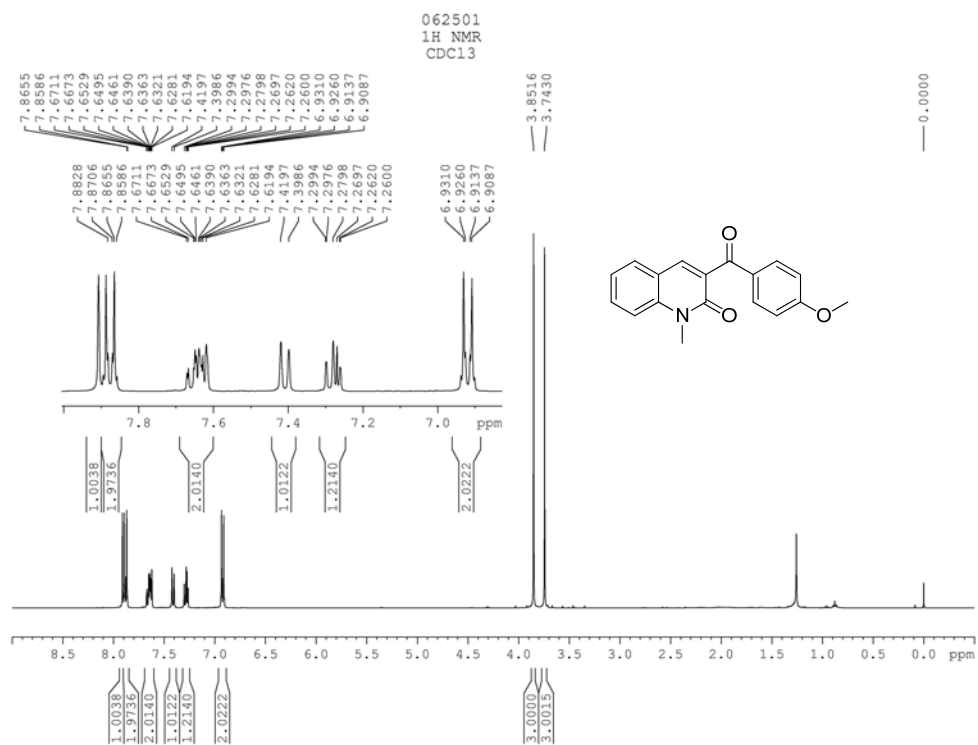

<sup>1</sup>H NMR spectrum of compound **5ad**

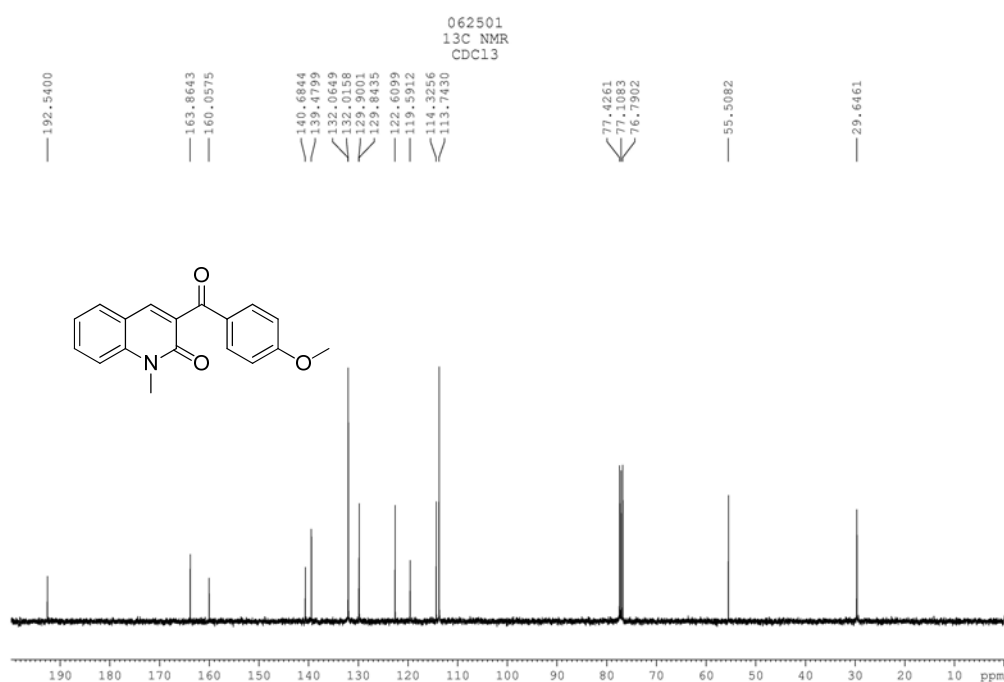

<sup>13</sup>C NMR spectrum of compound **5ad**

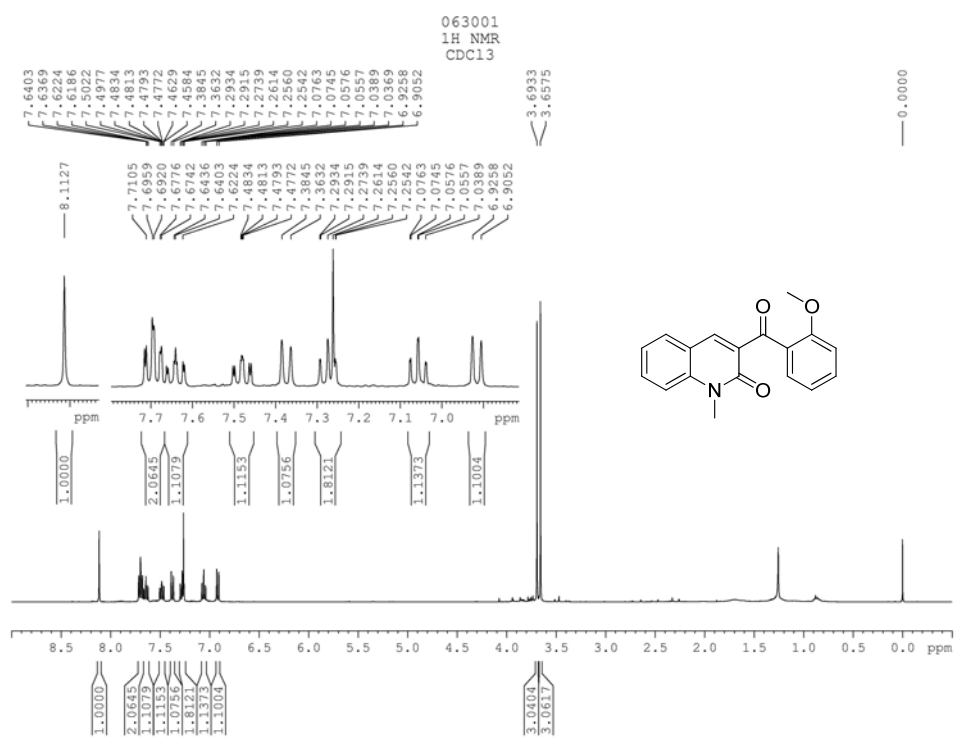

<sup>1</sup>H NMR spectrum of compound **5af**



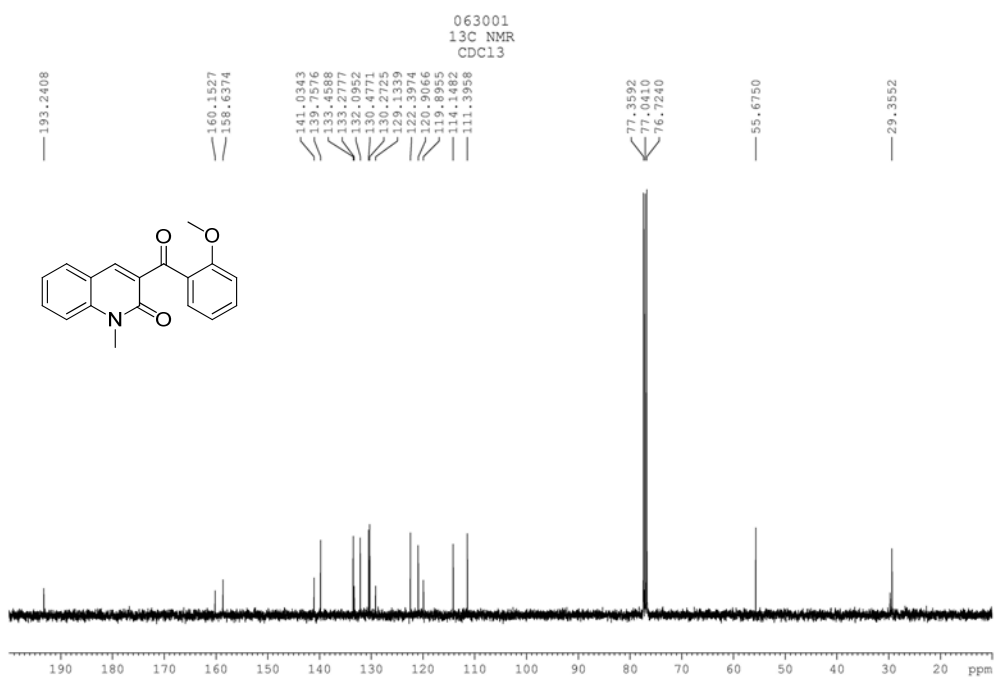

<sup>13</sup>C NMR spectrum of compound **5af**

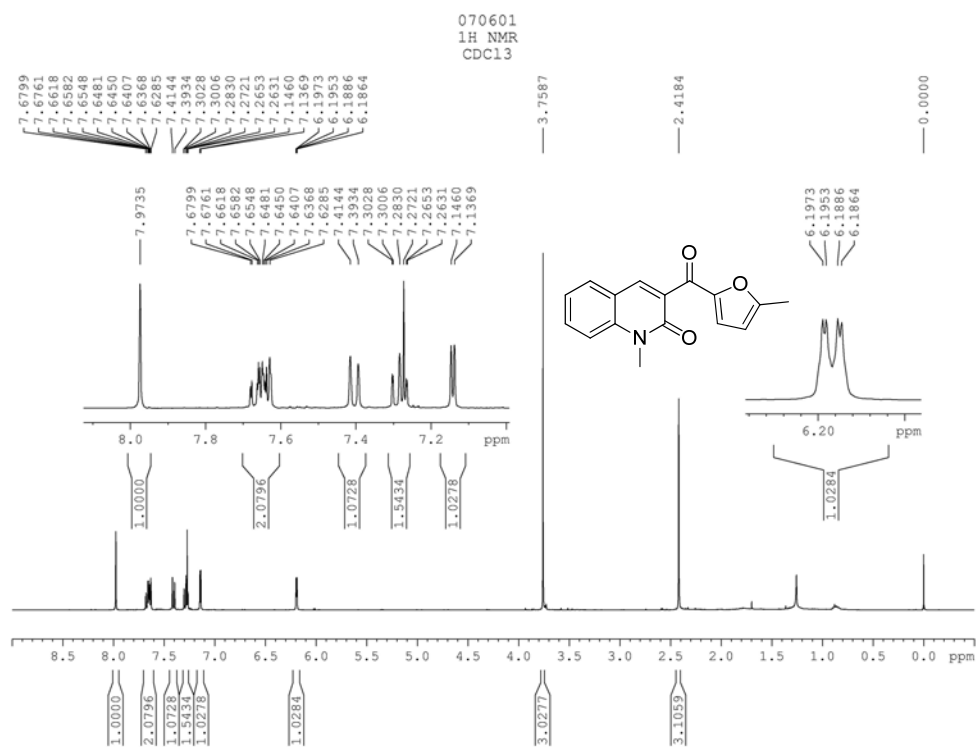

<sup>1</sup>H NMR spectrum of compound **5an**

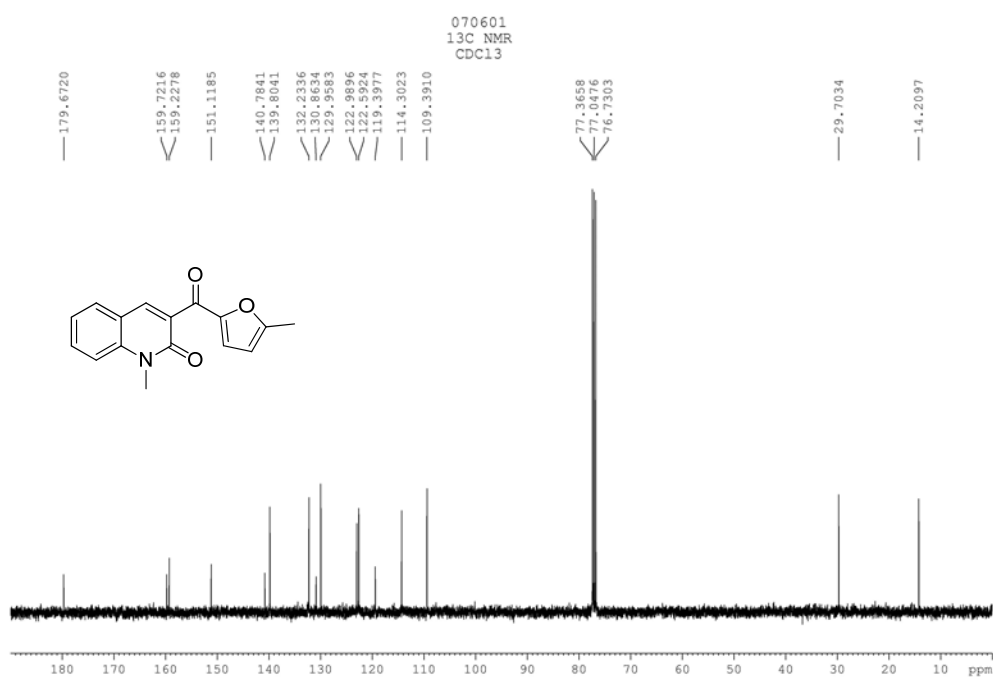

$^{13}\text{C}$  NMR spectrum of compound **5an**

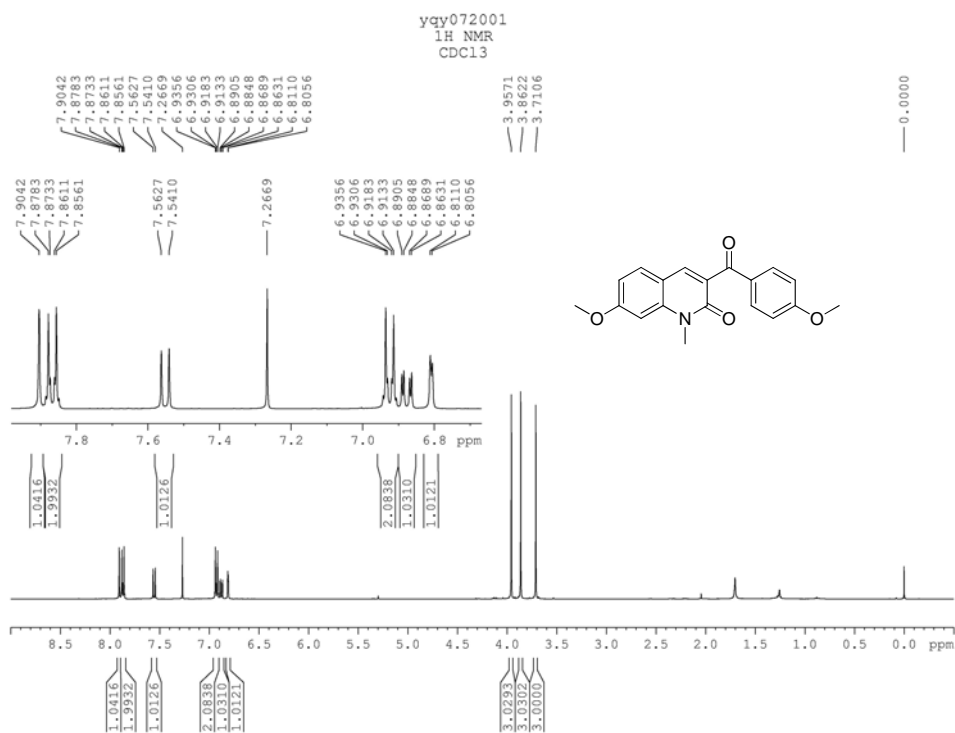

$^1\text{H}$  NMR spectrum of compound **5bd**

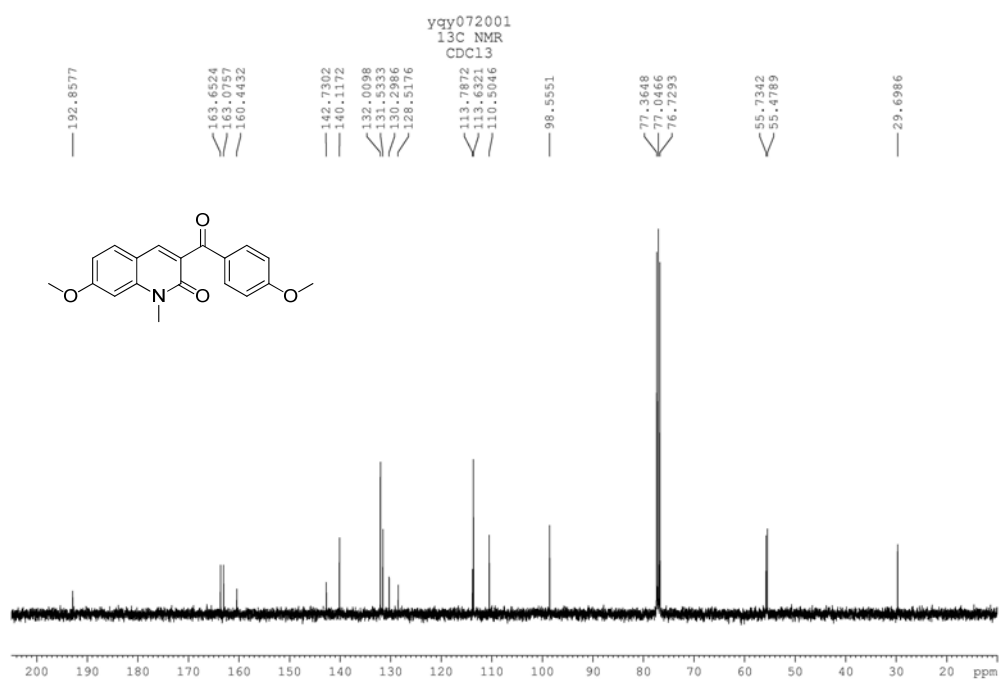

<sup>13</sup>C NMR spectrum of compound **5bd**

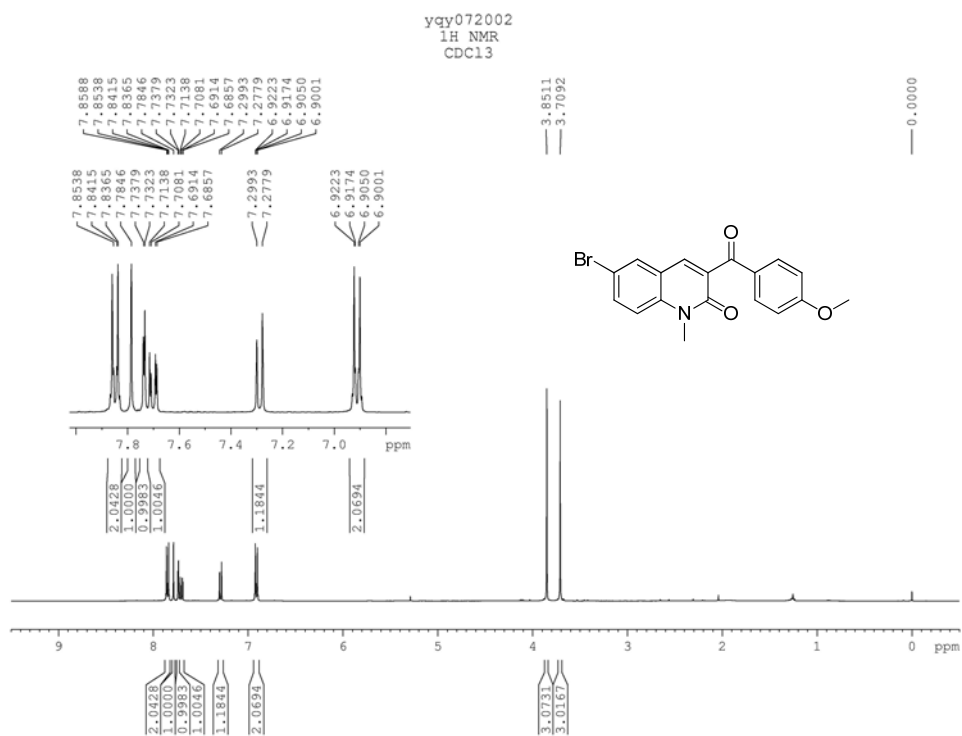

<sup>1</sup>H NMR spectrum of compound **5cd**

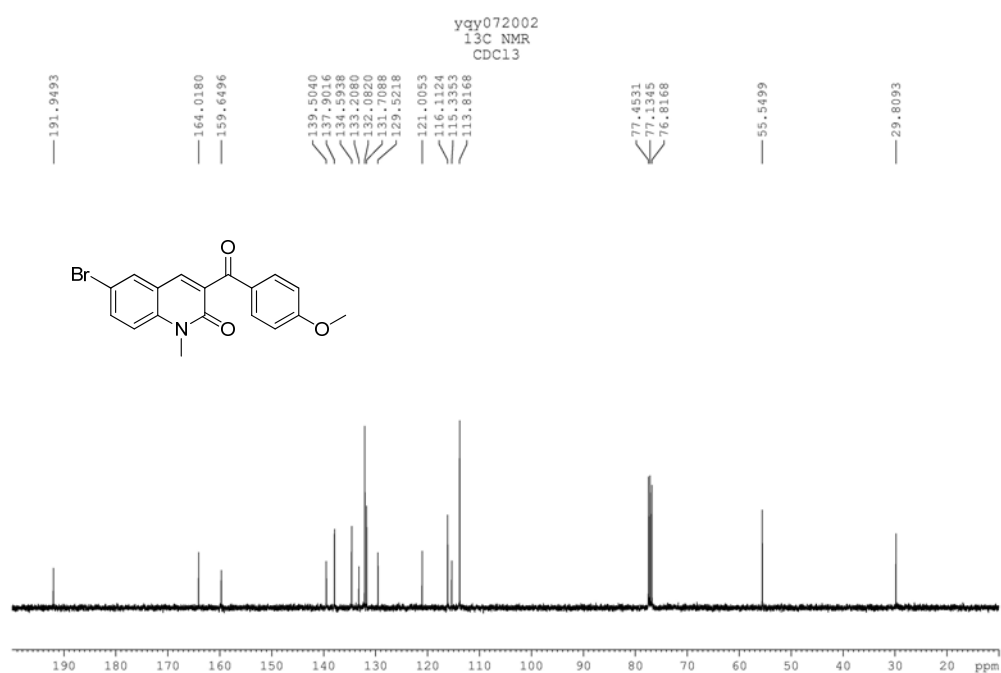

<sup>13</sup>C NMR spectrum of compound **5cd**
